# Supplementary material for: The Men’s Group at St. Pius V: A Case Study of a Parish-Based Voluntary Partner Abuse Intervention Program
Source: PubMed Central journal article supplement — Am J Mens Health. 2020 Feb 14;14(1):1557988319891287. doi: 10.1177/1557988319891287 (PMC7025425; doi:10.1177/1557988319891287), 2020-02-14
Supplement: Case_Study_Final_Spanish_Version_1_10_20_1.pdf [file Case_Study_Final_Spanish_Version_1_10_20_1.pdf]

**Note: Spanish version was not peer reviewed by the journal**

El Grupo de Hombres en San Pío V: Un Estudio de un Programa de una Parroquia Católica para la Intervención Voluntaria para los que Abusan a Sus Parejas

Maxine Davis, PhD, MSW, MBA<sup>1</sup>

Melissa Jonson-Reid, PhD, MSW<sup>2</sup>

Charles Dahm, O.P., PhD<sup>3</sup>

Bruno Fernandez, MSW<sup>4</sup>

Charles Stoops, PhD, MSW<sup>4</sup>

Bushra Sabri, PhD, MSW<sup>5</sup>

The University of Texas at Arlington, School of Social Work<sup>1</sup>

Washington University in St. Louis, Brown School of Social Work<sup>2</sup>

Archdiocese of Chicago Domestic Violence Outreach, St. Pius V Parish, HOPE Program<sup>3</sup>

Dominican University, School of Social Work<sup>4</sup>

Johns Hopkins University, School of Nursing<sup>5</sup>

## Resumen

La literatura sobre los hombres latinos y la intervención para la violencia/abuso de pareja íntima (IPV/A) es escasa. Más de 100 hombres han buscado ayuda *voluntariamente* para la perpetración de IPV / A del "El Grupo de Hombres" (The Men's Group) en la parroquia St. Pius V en Chicago, IL (EE. UU.) y han permanecido como miembros comprometidos por períodos prolongados. Métodos: Dada la rareza del compromiso prolongado sin obligación de la corte en los programas de intervención de agresores (BIP), se realizó un estudio de casos para explorar cómo funciona "El Grupo de Hombres" (TMG). Con base en múltiples fuentes de datos, este estudio examinó el desarrollo y la implementación del grupo (TMG), al mismo tiempo que investigó factores contextuales, motivadores y facilitadores de la participación de los participantes. Resultados: Los datos revelaron que "El grupo de Hombres" funciona dentro de un contexto de apoyo comunitario al usar una mezcla de técnicas tradicionales y prácticas innovadoras, creando una modalidad de tratamiento única. Se encontró que el programa era culturalmente sensible y basado en la espiritualidad. Las razones para la asistencia inicial variaron, pero incluyeron: 1) miedo a perder o pérdida real de su pareja / familia; 2) reconocer un problema y desear cambiarse para uno mismo o para otros; y 3) un deseo de alcanzar la paz interior. Tres temas ofrecen luz sobre por qué los hombres siguen participando en TMG, que incluyen: 1) ser recibidos con respeto por los facilitadores; 2) experimentar "El Grupo de Hombres" (TMG) como "familia"; y 3) obtener otros beneficios. Reflexión: La dependencia en el sistema de justicia penal no es suficiente para mejorar o prevenir la perpetración de IPV / A. Este programa se muestra prometedor como una alternativa o suplemento a los BIP tradicionales, que generalmente dependen de que los clientes tengan la obligación judicial de asistir al tratamiento. Dada la naturaleza generalizada de IPV / A, comprender el funcionamiento de otras

alternativas o suplementos o ayuda comunitaria a los BIP es fundamental para ampliar el acceso al tratamiento.

### **Información de Contexto**

El Centro para el Control de Enfermedades (CDC) define la violencia/abuso de pareja íntima (IPV / A) como "violencia física, violencia sexual, acoso y agresión psicológica (incluidas tácticas coercitivas) por parte de una pareja íntima actual o anterior" (Breiding, Basile, Smith, Black y Mahendra, 2015, p. 11). Una de cada tres mujeres y uno de cada diez hombres en los Estados Unidos han sufrido agresión física, agresión sexual y/o acoso por parte de una pareja íntima (Black, Basile y Breiding, 2011). IPV / A, comúnmente conocido como violencia doméstica (VD), se ha asociado con consecuencias negativas para las personas, las familias y las comunidades. Identificada como un problema de salud pública generalizado pero evitable, la Organización Mundial de la Salud ha señalado que la intervención para los perpetradores es una de las áreas más importantes de enfoque en los esfuerzos para poner fin a IPV / A (Rothman, Butchart y Cerda, 2003). Hasta ahora, la investigación se ha centrado en la programación ordenada por el tribunal, que ha recibido críticas significativas relacionadas con el compromiso y la efectividad.

### **Intervenciones tradicionales para combatir la violencia entre parejas (IPV)**

El sistema de justicia penal de EE. UU. ha respondido a la violencia doméstica ~~en~~ criminalizando ciertas formas de IPV / A. Sin embargo, se estima que solo el 1% de los hombres que cometen violencia doméstica en realidad es arrestados y condenados (Stark, 2007). Tras la convicción, muchos delincuentes son obligados posteriormente por el tribunal a obtener tratamiento como condición de su libertad condicional o libertad con supervisión (Dalton, 2007).

Los infractores de DV pueden participar en programas de intervención de agresores (BIP) además de o en lugar de encarcelamiento (Herman, Rotunda, Williamson y Vodanovich, 2014). También conocida como programas de intervención para el abuso entre parejas (PAIP, por sus siglas en inglés), la mayoría de los estándares estatales respaldan el tratamiento psicoeducativo o cognitivo conductual de estilo grupal. A pesar de que el 90% de los participantes de PAIP ingresan al tratamiento por mandato judicial, generalmente solo el 50% completa el tratamiento (Daly y Pelowski, 2000). El aumento de la asistencia y el compromiso están fuertemente vinculados a la reducción de la reincidencia (Gondolf, 2011). Sin embargo, la evidencia general sobre la efectividad de los PAIP tradicionales en la reducción de DV sigue siendo mixta (Arias et al, 2013). Se han introducido una serie de innovaciones en los PAIP (incluida la programación voluntaria) en un esfuerzo por mejorar la asistencia y la participación. Sin embargo, persisten importantes áreas faltantes en el conocimiento sobre los PAIP voluntarios basados en la comunidad.

### **Creencias basadas en la fe como intervenciones para el abuso de pareja**

Una forma de programación alternativa basada en la comunidad ha sido la intervención basada en la fe. Si bien la religión se puede usar como un medio de control dentro de las asociaciones íntimas (Davis, 2015; Lira, Koss y Russo, 1999; Starr, 2017), algunos sugieren que la religión también se puede usar en el tratamiento para desafiar y dismantelar el problema de IPV / A. La teóloga Jeanne Hoefft (2009) respalda la religión y la cultura como herramientas útiles para alentar la resistencia de IPV / A debido al poder que tienen para guiar la vida de muchas personas. Esta línea de pensamiento y filosofías similares han llevado al desarrollo de una serie de PAIP basados en la fe (Kroegeer y Nason-Clark, 2010).

No existe una definición clara o uniforme de lo que significa ser una organización de servicio social "basada en la fe" (Jeavons, 1997). Varios académicos han señalado que tales inconsistencias en la definición de organizaciones "basadas en la fe" causan confusión al comprender la verdadera naturaleza de la provisión de servicios sociales (Sider y Unruh, 2004; Ebaugh, Chafetz y Pipes, 2006). Ebaugh, Chafetz y Pipes (2006) sugieren que la categorización puede variar de relacionada con la fe a saturada de fe, con la actuación basada en la fe como un punto medio. De todos modos, se sabe poco sobre el contexto y la función de los PAIP basados en la fe o sus participantes.

Nason-Clark y colegas (2004) publicaron el primer estudio empírico que documenta las características de los participantes de PAIP basados en la fe. La revisión de 1,059 archivos de casos cerrados reveló que los participantes en un PAIP basado en la fe del estado de Washington tenían más probabilidades de ser anglo sajón (79.8%), casados (47.3%) y estar empleados (87.4%), en comparación con los participantes en un programa secular. Además, en comparación con los participantes ordenados por el tribunal, los hombres que fueron alentados por los líderes religiosos a inscribirse en un PAIP tenían más probabilidades de completar el tratamiento (Nason-Clark, Murphy, Fisher-Townsend y Ruff, 2004).

Las entrevistas en profundidad (N = 55) con los que completaron el programa de un programa estatal de Oregón proveen evidencia sobre la implementación de un programa basado en la fe que fue certificado para tratar a clientes voluntarios y obligatorios de la corte. Los participantes informaron que los facilitadores del grupo *no* hicieron proselitismo, apelaron al corazón espiritual del participante para reducir la perpetración, o requirieron reflexión religiosa o espiritual. En cambio, los datos revelaron que el *cliente* controlaba cómo se integraba su espiritualidad religiosa en el tratamiento (Nason-Clark y Fisher-Townsend, 2015).

<sup>1</sup>Contrariamente a los informes acerca de que los PAIP seculares son confrontativos (Crane y Eckhardt, 2013), los participantes en el PAIP basado en la fe del estado de Oregón informaron sentirse parte de un entorno sin prejuicios y se les hizo responsables de una manera no conflictiva. El personal de PAIP basado en la fe utilizó el uso voluntario de los participantes del lenguaje religioso como un recurso para un cambio positivo e incorporó componentes relevantes de la fe de la persona en el proceso de tratamiento de las personas (Nason-Clark y Fisher-Townsend, 2015)

### **Intervenciones culturalmente sensibles para combatir la IPV con hombres latinos**

En general, la sensibilidad cultural se considera un sello distintivo de una fuerte programación de intervención (Barrera Jr., Castro, Strycker y Toobert, 2013). A pesar de que la población Latinx es el grupo étnico más grande en los EE. UU. (Flores, 2017), y las tasas de IPV se estiman entre 17% y 68% (Straus y Smith, 1990; Caetano, Cunradi, Clark y Schafer, 2000; Negro, Basile, & Breiding, 2011; Klevens, 2007), hay una escasez de estudios de investigación sobre la violencia de IPV / A entre los hombres latinos (Cummings, Gonzalez-Guarda, y Sandoval, 2013).

Pocos estudios han examinado que la programación PAIP sea culturalmente relevante para los hombres latinos (Babcock, et al., 2016). Celaya-Alston (2010) realizó un estudio que resultó en una intervención DV definida por la comunidad para los hombres inmigrantes mexicanos. El plan de estudios fue diseñado en colaboración con hombres latinos para incorporar temas culturalmente específicos y relevantes para el caso de IPV / A Aunque las pruebas previas

---

<sup>1</sup> A diferencia de la búsqueda más individualista de la espiritualidad por el significado y la conexión con lo sagrado, la religión a menudo se distingue como un sistema organizado y más formal de puntos de vista, comportamientos y rituales mundiales utilizados para ayudar a la cercanía a Dios (Koenig, McCollough y Larson, 2001). La religión puede entenderse como una expresión de fe, mientras que la espiritualidad puede entenderse como la experiencia personal de "lo sagrado y lo divino" (Bent-Goodley y Fowler, 2006). Por lo tanto, la religión a menudo implica espiritualidad; sin embargo, lo contrario no es necesario.

y posteriores mostraron una mejora en el conocimiento, el tamaño de la muestra ( $N = 9$ ) era demasiado pequeño para los análisis estadísticos. Un grupo mas pequeño de entrevistas cualitativas ( $n = 3$ ) sugirió que los participantes ampliaran sus definiciones de DV, dado esto ellos quedaron satisfechos con el programa y asistirían a más sesiones. Parra-Cardona, et al (2013) realizaron un estudio de evaluación cualitativa de hombres latinos ( $N = 21$ ; 20 inmigrantes mexicanos) con una versión en español adaptada culturalmente del programa modelo Duluth. Los hombres en el estudio informaron que el programa les ayudó a involucrarse en la auto-reflexividad, reconocer la necesidad de relaciones igualitarias y desafiar la violencia como aceptable, al mismo tiempo que integraba discusiones sobre valores y experiencias latinas (es decir, respeto, machismo) y otras experiencias (es decir, discriminación).

### **La necesidad de la coexistencia entre la espiritualidad y la cultura en programas para hombres latinos**

Dos estudios innovadores han analizado la necesidad o la incorporación de programas tanto espirituales como culturales en el tratamiento PAIP para hombres latinos. Welland & Ribner (2001) dio un cuestionario a 159 hombres inmigrantes mexicanos quien tenían un mandato de asistir a un PAIP por la corte del estado de California. El noventa y cinco por ciento de los encuestados se auto identificó como cristianos. De estos, el 80% católicos. El 89% declaró que su religión era importante en su vida diaria, y para el 51% [la religión] era muy importante (Welland y Ribner, 2001). Un estudio cualitativo de seguimiento reveló que los participantes varones (inmigrantes mexicanos) de PAIP, "... valoraron considerablemente sus creencias espirituales y declararon que deseaban ser guiados por ellos en su comportamiento. Ellos [los participantes] también acordaron que su iglesia está en contra de la violencia hacia la pareja y respalda valores [como] el respeto y el amor por los demás y el cuidado de la familia" (Welland

y Ribner, 2010, p. 804). Los hallazgos de este estudio sugirieron que este contenido necesita ser especializado para un PAIP y adaptado culturalmente para los delincuentes latinos de IPV / A (Welland y Wexler, 2007, p. Xvii):

- Énfasis en la discusión de roles de género, masculinidad y machismo.
- Plan de estudios sobre el tratamiento y la educación de los niños.
- Reconocimiento de la experiencia de discriminación contra inmigrantes y mujeres.
- Discusión de los cambios en los roles de las personas después de la inmigración.
- Discusión abierta del abuso sexual en las relaciones íntimas.
- Inclusión de la espiritualidad asociada a la prevención de la violencia familiar.

La investigación sobre PAIP (culturalmente adaptados y basados en la fe) que sirven a los hombres latinos es escasa. La mayoría de la programación y los estudios más grandes se han concentrado en la participación obligatoria en los programas seculares (Cannon, 2016; Babcock, et al., 2016). Con la excepción de los estudios recientemente publicados (Tutty, Babins-Wagner y Rothery, 2019), también hay lagunas sustanciales en la literatura sobre participación voluntaria en PAIP. El propósito de este artículo es ayudar a llenar algunas de estas lagunas al informar sobre un estudio de caso en profundidad de un PAIP culturalmente sensible, espiritual y voluntario que sirve a hombres latinos. Ningún estudio publicado hasta la fecha ha examinado la combinación de todos estos elementos en un BIP.

## **El Estudio Actual<sup>2</sup>**

---

<sup>2</sup> El modelo de Duluth se basa en la teoría feminista que sugiere que la causa principal de la violencia doméstica es la ideología patriarcal que sanciona el uso del poder y el control de los hombres sobre las mujeres (Bennett y Piet, 1999; Price y Rosenbaum, 2009). El enfoque generalmente rechaza la posición de que las personas que eligen usar la violencia o actuar de forma abusiva contra una pareja íntima lo hacen debido a un trastorno mental u otros factores de nivel individual. El modelo también se basa en la teoría del aprendizaje social, y ve el IPV / A como un comportamiento aprendido sancionado socialmente (Lehmann y Simmons, 2009; Pence y Paymar, 1993).

**Locación:** Chicago, IL es una gran ciudad del medio oeste de los Estados Unidos con la segunda población (nacida en México) más grande del país (Misra, 2014). Pilsen es un barrio en la región suroeste de Chicago. El ochenta y siete por ciento de los residentes de Pilsen es hispanos / latinx (predominantemente inmigrantes mexicanos). El nivel socioeconómico es bajo y es un factor de riesgo para la IPV (Cunradi, Caetano, Clark y Schaffer, 2000; Mancera, Dorgo y Provencio-Vásquez, 2017) y el 52.47% de los residentes en Pilsen viven por debajo del umbral de pobreza.

San Pío V, una parroquia católica ubicada en Pilsen, ha desarrollado un historial extensivo de compromiso social y político en Pilsen (Pallares y Flores-González, 2010; Grossman, et al., 2000; Dahm y Harper, 1999) al mismo tiempo se ha convertido en la iglesia más poblada de la comunidad (Badillo, 2005). En el 2013 St. Pius V se convirtió en el hogar del programa parroquial de violencia doméstica mas conocido en los Estados Unidos (Starkey, 2015). El programa HOPE Family Services (referido como el programa HOPE) ofrece cursos para padres, apoyo para sobrevivientes, servicios de apoyo para niños, prevención de violencia entre parejas, servicios para perpetradores y asesoramiento individual y para parejas. Desde 2011, más de 400 hombres han buscado ayuda voluntariamente para casos de IPV / A a través de "The Men's Group" o El Grupo de Hombres (TMG), que es un servicio dentro del programa HOPE. Los informes anecdóticos y del programa sugieren que más de 100 de estos hombres han permanecido constantemente involucrados en el TMG durante varias sesiones y / o años.

### **El Enfoque<sup>3</sup>**

Este estudio empleó un enfoque de investigación participativa basada en la comunidad (CBPR), un proceso que une a miembros de la comunidad e investigadores en igualdad de

---

<sup>3</sup> Los datos de la entrevista revelaron que el asesoramiento de parejas solo lo realiza el Programa HOPE bajo un estricto conjunto de parámetros que se centran en la seguridad de las víctimas y los sobrevivientes. Estos parámetros incluyen, entre otros, la solicitud de víctima-sobreviviente, el compromiso constante de la pareja abusiva en "El Grupo de Hombres" TMG.

condiciones para diseñar y llevar a cabo investigaciones significativas para la comunidad (Israel, Schulz, Parker y Becker, 1998). Este enfoque fue seleccionado para: a) asegurar que el programa en estudio obtenga información útil; b) invertir las prácticas de investigación históricamente excluyentes en comunidades de color en un modelo de investigación colaborativo, en el cual la comunidad actúa como una colaboración; c) mejorar la validez del estudio en refinando los procedimientos basados en los conocimientos de los miembros de la comunidad. Se convocó una junta de orientación colaborativa / asesora (CAB) con miembros de la comunidad con el objetivo de realizar una investigación sólida y segura. El CAB consistió de representantes de una agencia local de servicios para víctimas y sobrevivientes de DV, dos PAIP tradicionales locales (que atienden principalmente a participantes ordenados por la corte), cofundador del programa HOPE, un representante de la iglesia San Pio V, un representante de una escuela local de trabajo social, y el investigador principal. Se adoptó un estudio de caso intrínseco como método de investigación debido al número excepcionalmente alto de participantes voluntarios en TMG (Stake, 1995; Creswell y Poth, 2017).

### **Fiabilidad y credibilidad**

Creswell (2003) describe el estudio de caso cualitativo como un método que se emplea para obtener una comprensión profunda de un "programa, un evento, una actividad, un proceso, de uno o más individuos" (p. 15). Los estudios de caso están interesados en el "proceso ... en contexto más que en una variable específica, en el descubrimiento en lugar de la confirmación" (Merriam, 1998, p. 19). Un objetivo de la investigación es proporcionar una descripción holística del caso y para hacerlo fue necesario examinar cómo funciona "El grupo de hombres" (TMG). A menudo denominada confiabilidad en la investigación cuantitativa, la confiabilidad en la investigación cualitativa se basa en una certeza relativa de que otro investigador podría obtener

hallazgos similares con respecto al proceso de TMG. La validez, que se conoce como credibilidad en un estudio de caso cualitativo, se facilita recurriendo a múltiples fuentes como un mecanismo de evaluación constante y reevaluación de datos para garantizar que los hallazgos representen con precisión el caso que se está investigando. Según las recomendaciones de los expertos, se utilizaron múltiples fuentes de datos (es decir, entrevistas, grupos focales, observaciones directas, revisión de documentos archivados y notas de reflexividad del investigador) para informar los hallazgos (Stake, 1995; Yin, 2003).

### **Muestreo del Estudio**

Este estudio empleó tres estrategias de muestreo (Creswell y Poth, 2017). El muestreo atípico (también conocido como "extremo o desviado") se utilizó para seleccionar el sitio debido a la cantidad inusualmente alta de participantes voluntarios. El criterio de muestreo fue seleccionado para recolectar datos de individuos que se creía que estaban íntimamente familiarizados con TMG. Esta muestra se limitó a entrevistas con el personal, el clero o los administradores del Programa HOPE y a grupos focales de participantes actualmente comprometidos de TMG. Para obtener nuevos clientes potenciales y aprovechar los puntos de datos inesperados, se seleccionó una estrategia de muestreo oportunista o emergente para realizar observaciones en persona y en notas (Patton, 2002). El muestreo emergente también se utilizó para seleccionar los artefactos incluidos en la revisión de documentos.

### **Recopilación de datos**

El investigador principal recolectó artefactos asociados con “el grupo de hombres” TMG como evidencia contextual y facilitadora. Estos artefactos incluyeron materiales de mercadeo, boletines parroquiales, invitaciones a eventos, carteles y materiales educativos. Se recopilaron,

artículos periodísticos, sitios web, videos, informes disponibles públicamente y documentos internos; estos fueron revisados y evaluados para asegurar la relevancia para el estudio y se incluyeron como datos de archivo. Durante la investigación, el investigador principal visitó sitios web y publicaciones / sitios de redes sociales regularmente para capturar cualquier cambio relevante.

Las entrevistas individuales semiestructuradas con los líderes de la parroquia, los administradores y el personal se llevaron a cabo en inglés por el IP (Investigador primario) (n = 4) y fueron grabadas. No se proporcionó ningún incentivo a los administradores, el personal o el clero. El reclutamiento para las entrevistas de administración / personal se realizó mediante la publicación de volantes en el sitio en St. Pius V. El reclutamiento para los grupos focales de participantes actuales se realizó mediante la publicación de volantes en los sitios de reunión grupal. Los facilitadores también anunciaron la oportunidad de participar al final de dos sesiones grupales. El consentimiento informado se realizó individualmente en el idioma preferido del participante antes del grupo focal por el investigador principal (PI) y dos asistentes de investigación de nivel de maestría (Asistentes de investigación; AI). La certificación del consentimiento informado se obtuvo de todos los participantes. Los grupos focales fueron compuestos de participantes nuevos, participantes con señoría y estos grupos fueron realizados en español (n = 18; dos grupos de nueve). La entrevista fue semi-estructurada, basada en un guión previamente redactado y traducido, para guiar la discusión. El IP redactó las preguntas en colaboración con el miembro del CAB que representa a la parroquia (ver Apéndice A). Los grupos focales fueron grabados en audio y traducidos al inglés por el miembro del equipo de investigación que facilitó los grupos focales en español. Los grupos focales se llevaron a cabo en una universidad local para promover la confidencialidad. Se proporcionó un incentivo en

efectivo de \$50 y una retribución en efectivo de \$10 para cubrir costos de viaje a la universidad a cada persona que participó.

El CAB contrató a un líder de grupo bilingüe para dirigir los grupos de enfoque. Esta persona también fue contratada por el investigador principal para traducir y grabar versiones en inglés de ambos grupos focales. Dos estudiantes bilingües de posgrado de trabajo social estuvieron presentes para tomar notas y observaciones sobre el lenguaje corporal de los participantes y para proveer un resumen sobre el contenido de la reflexión. Los asistentes de investigación estuvieron disponibles para ayudar con la traducción, la traducción inversa y la confirmación de que los datos se tradujeron con la mejor precisión. Cada AI recibió 40-60 horas de capacitación en VD antes de unirse al equipo de investigación. Tanto el IP como el facilitador de grupos focales tenían maestrías en trabajo social, antecedentes en psicología, más de 60 horas de capacitación en VD y una combinación de cuatro años de experiencia facilitando grupos mandados por la corte y siguiendo el modelo de Duluth. La experiencia en contenido y la capacitación de todo el equipo de investigación permitieron que los grupos focales se facilitaran con un enfoque humanista, y que una perspectiva de psicología social e informada por IPV/A fuera usada para la formulación de notas y preguntas de seguimiento (Stewart y Shamdasani, 2015). Cada grupo de enfoque duró aproximadamente 2.5 horas.

El IP realizó observaciones de sesiones del “grupo de hombres” TMG, eventos programados por el grupo, eventos comunitarios, servicios de la iglesia y otras funciones durante un período de nueve meses. Más de 60 horas de observación y 30 páginas de notas de observación directa y notas reflexivas se incluyeron como datos en este estudio. El IP vivió en el barrio de Pilsen durante 12 meses consecutivos durante la recopilación de datos como un medio de inmersión completa en la comunidad. Después de que el miembro del equipo de investigación

realizó la traducción y el audio grabado en inglés, los datos de audio de los grupos focales y otras entrevistas fueron transcritos por un servicio de transcripción profesional.

**Consideraciones éticas.** El IP y los AI adoptaron las mejores prácticas para garantizar que los participantes, especialmente los miembros de TMG, entendieran lo que significaba ser un participante durante este estudio. Al final del procedimiento de consentimiento, se adaptó e incluyó un breve cuestionario sobre las mejores prácticas recomendadas para consentir a los participantes de PAIP involucrados en la corte (Crane, Hawes, Mandel y Easton, 2013). Los miembros del CAB y otros profesionales académicos revisaron la entrevista semi-estructurada del personal y las preguntas de los grupos focales de los participantes para asegurar que fuera el lenguaje apropiado, las áreas sean sustantivas y la duración de la entrevista fuera apropiada. La Junta de Revisión Interna (Internal review board; IRB) aprobó todos los procedimientos.

**Análisis de Información.** Se utilizó un método constante y comparativo (Glaser y Strauss, 1967) para guiar el análisis de datos. Primero se examinaron los artefactos, incluyendo los documentos internos, artículos periodísticos, datos de sitios web, publicaciones / sitios de redes sociales, boletines y videos, en busca de datos indicadores. La información pertinente fue leída, interpretada y revisada a fondo por el IP varias veces en un proceso iterativo, ya que también se recopilaron y analizaron datos de otras fuentes (Bowen, 2009). Complementario a las entrevistas y observaciones, estos artefactos proporcionaron información completamente nueva, fueron analizados en busca de contradicciones y apoyo para datos de otras fuentes (Altheide, Coyle, DeVriese y Schneider, 2008). El IP organizó y clasificó datos de artefactos / documentos utilizando códigos a medida que fueron desarrollados y refinados a lo largo de la duración del estudio. Estos datos se utilizaron para informar las preguntas de investigación.

Dedoose, un programa basado en la web, se utilizó para la gestión de datos de sujetos humanos, notas de observación directa y notas reflexivas. La IP escuchó archivos de audio (versión en inglés) y leyó las transcripciones varias veces para familiarizarse con los datos. Como describe Bernard (2013), el análisis de datos cualitativos es "la búsqueda de patrones en los datos y ... ideas que ayudan a explicar por qué esos patrones están allí en primer lugar" (p. 394). Se utilizó un enfoque inductivo para desarrollar categorías y subcategorías a través de la codificación abierta, un proceso que organiza los datos en "cuadros" a medida que las transcripciones se revisaron línea por línea (Miles, Huberman y Saldana, 2013). El IP escribió y usó un libro de códigos basado en las preguntas guía de la entrevista / grupo focal para la clasificación independiente inicial. El libro de códigos y las definiciones se revisaron / refinaron continuamente según fuera necesario. Luego, el IP entrenó a un AI, que estaba familiarizado con las culturas mexicanas, sobre los procedimientos de codificación cualitativa utilizando el libro de códigos previamente escrito. El AI luego codificó de forma independiente las transcripciones. Luego, el IP y la AI participaron en la codificación de consenso y un tercer codificador estuvo disponible para decidir sobre cualquier discrepancia sin resolver (Hill, et al., 2005). Este proceso fue seguido por una codificación axial, un proceso para "ajustar las piezas del rompecabezas de datos" (Miles, Huberman y Saldana, 2013). Mediante el análisis temático, se identificaron, seleccionaron, refinaron y utilizaron temas centrales que proveen mas evidencia sobre el caso y ayudan a mejorar e informar las preguntas de investigación (Israel, Schulz, Parker y Becker, 1998).

### **Estándares de Calidad Obligatorios**

Para garantizar la calidad, la verificación de los miembros, la triangulación (es decir, la verificación de la información a través de diferentes fuentes), descripciones detalladas, la

reflexividad del investigador (es decir, la memoria o detalle en notas) y el compromiso prolongado se utilizaron como estrategias para mejorar tanto la fiabilidad como la credibilidad. La verificación de los miembros se realizó durante todo el estudio en una variedad de formas como un mecanismo para minimizar las creencias de los investigadores que se imponen a los datos. Los AI resumieron brevemente los puntos principales de discusión durante los grupos focales y verificaron el contenido con los participantes al final de cada sesión. El personal y los administradores recibieron transcripciones literales de sus entrevistas grabadas para garantizar la precisión de sus declaraciones. En otro acto de verificación de miembros, los hallazgos preliminares fueron presentados al personal, administradores y clérigos afiliados al programa HOPE para verificar que los resultados representaban con precisión al “grupo de hombres” TMG. Los miembros confirmaron los hallazgos, proporcionaron claridad y corrigieron las inexactitudes mediante una discusión abierta. Un ejemplo de las correcciones realizadas fueron los términos descriptivos utilizados para nombrar discusiones de temas semanales (es decir, comunicación de relación saludable en lugar de comunicación de relación).

Un miembro del CAB y el IP diseñaron conjuntamente un resumen breve de una página sobre los hallazgos del estudio. Los AI tradujeron el resumen en español y las traducciones fueron editadas por el mismo miembro (bilingüe) de la junta antes de la finalización. El informe (en inglés y español) se entregó a los miembros de TMG para garantizar que los resultados reflejaran con precisión su percepción de cómo funciona el grupo, por qué los hombres se unen al programa y por qué los hombres continúan participando en el grupo. La siguiente declaración se hizo en español e inglés a medida que se proporcionaban copias impresas del informe breve al final de la sesión final del grupo que observaron el IP y la RA (consulte el Apéndice B para ver el informe breve):

*“Aunque nos vean de vez en cuando, esta noche es la última noche que [AI / nombre del traductor] y yo estaremos aquí en grupo. Nos gustaría agradecerles a todos por darnos la bienvenida y la oportunidad para aprender más sobre el grupo de hombres. Ha sido un placer haber estado en este espacio sagrado [haciendo referencia a la presencia de seis observaciones de sesiones grupales]. Les agradecemos que han sido vulnerables frente a nosotros, y no lo doy por algo simple. Tengan en cuenta que respetaremos la confidencialidad de este grupo. Ningún nombre o ninguna de las historias compartidas serán parte de nuestro informe. Aquí hay un breve resumen de los resultados: el informe completo estará disponible más adelante. Si ustedes está interesado en lo que creo que encontré, puede mirar aquí [haciendo referencia al apéndice B] en español e inglés o hablar con nosotros. Si hay algo que no entendimos correctamente o si cree que hay un problema con la forma en que describimos al grupo, notifíqueme o envíe un mensaje a través de [los facilitadores del grupo]. Si no escucho nada, yo asumiré que todo está bien y avanzaré en la publicación del informe ... ”.*

*Investigador principal: 22 de marzo de 2017*

Cuatro meses transcurrieron antes de que el equipo de investigación procediera a escribir los hallazgos. Los miembros de TMG no solicitaron corregir, cambiar o editar los resultados del estudio. Estas estrategias para el aseguramiento de la calidad se adoptaron y emplearon porque se consideran prácticas esenciales en la recopilación y análisis de datos cualitativos (Creswell y Clark, 2016).

## Conclusiones & Resultados

Este estudio exploró tres preguntas principales de investigación. En la Tabla 1 se presenta una organización grafica de los resultados. Sin embargo, estos hallazgos descansan dentro de las condiciones contextuales que rodean a TMG, que se detallan al comienzo de esta sección. De mayor importancia, los hallazgos principales de este estudio condujeron al desarrollo de un modelo teórico que explica la participación prolongada de hombres sin mandato judicial en la programación de intervención de abuso de pareja, que se presenta al final de esta sección (ver figura 1). Tabla 1.

*Breves conclusiones y resumen de resultados*

| Pregunta de Investigación | Fuente de datos/ Métodos | Conclusiones y Resultados |
|---------------------------|--------------------------|---------------------------|
|---------------------------|--------------------------|---------------------------|

|                                                                                                                                                       |                                                                                                                                                                                                                  |                                                                                                                                                                                                                                                                                                                                                                                                                                    |
|-------------------------------------------------------------------------------------------------------------------------------------------------------|------------------------------------------------------------------------------------------------------------------------------------------------------------------------------------------------------------------|------------------------------------------------------------------------------------------------------------------------------------------------------------------------------------------------------------------------------------------------------------------------------------------------------------------------------------------------------------------------------------------------------------------------------------|
| 1.¿Qué es TMG y cómo funciona? (es decir, cómo comenzó, los factores contextuales importantes, cómo se financia, qué es, para quién, qué hacen, etc.) | <ul style="list-style-type: none"> <li>• Observaciones</li> <li>• Entrevistas del personal y administradores</li> <li>• Grupos Focales de participantes</li> <li>• Revisión de documentos catalogados</li> </ul> | TMG es un programa voluntario de basado en la cultura, la espiritualidad y el trauma para combatir la violencia domestica para hombres de habla hispana. TMG es parte de el proveedor mas grande de servicios de violencia doméstica con sede en la parroquia St. Pius V en Chicago, IL. TMG alienta a los miembros del grupo a ser voluntarios, vincularse y apoyarse mutuamente, socialmente, y afuera de las sesiones grupales. |
| 2a. ¿Qué motiva a los participantes actualmente involucrados a asistir inicialmente a TMG?                                                            | <ul style="list-style-type: none"> <li>• Grupos Focales de Participantes</li> <li>• Entrevistas del personal y administradores</li> </ul>                                                                        | Los participantes de TMG están motivados para asistir a sesiones por una variedad de razones. Los factores más comúnmente reportados involucraron el deseo de paz interior, miedo a perder la familia o los hijos y reconocer la presencia de un problema.                                                                                                                                                                         |
| 2b. ¿Por qué los participantes actualmente involucrados siguen participando en TMG?                                                                   | <ul style="list-style-type: none"> <li>• Grupos Focales de Participantes</li> <li>• Observaciones</li> <li>• Entrevistas del personal y administradores</li> </ul>                                               | Tres temas principales surgieron para responder a la pregunta de por qué los hombres permanecen voluntariamente como participantes. Ellos informaron que el personal los recibió con respeto y dignidad como un factor principal. También enfatizaron los lazos familiares que crearon con otros miembros del grupo y últimamente el valor de los beneficios de aprendizaje percibidos                                             |

#### RQ 1: Que es “El Grupo de Hombres”(TMG) y como funciona?

### Condiciones contextuales que rodean al grupo de hombres

El contexto en el que existe el programa HOPE y TMG es integral para comprender cómo el programa TMG se desarrolló y sirve a los participantes. Los dos factores críticos que rodean el entorno de TMG son los siguientes:

**1. Una relación fuerte entre la comunidad y la parroquia.** Basado en distintos documentos incluyendo artículos de periódicos, publicaciones académicas que exploran la comunidad y comentarios en las redes sociales, los líderes parroquiales de San Pío V son considerados pilares de la comunidad Pilsen (ver Contexto 1). Estas fuentes indicaron que el



### Pilsen priest crisscrosses archdiocese to talk about domestic violence

Written By Mitch Dudek, Chicago Sun-Times, Posted: 02/20/2016

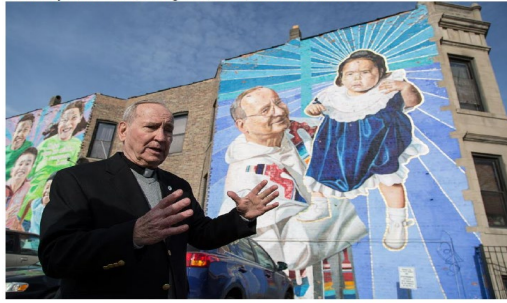

The Rev. Chuck Dahm talks at churches throughout the Chicago archdiocese about domestic violence. | Lou Foglia / Sun-Times

Credito fotográfico: Chicago Sun Times- permiso para la copia obtenido

Los datos de observación, las notas reflexivas y las transcripciones de los datos de video archivados indican que sus charlas / sermones sobre el tema de IPV / A fueron directas, basadas en la investigación y interactivas, pero también compasivas. Las homilías invitan a las personas que han perpetrado o experimentado violencia y abuso a buscar ayuda. De hecho, dos de los participantes del grupo focal mencionaron la razón por la que buscaron ayuda de TMG fue al escuchar un sermón en VD que fue dado por "un sacerdote de San Pío V". Como dijo un participante, *"el sacerdote de San Pío fue a mi iglesia ... Y ... cuando escuché la historia de violencia doméstica, abuso ... pensé que esto era casi mi vida. Entonces, después de la misa, me reuní con el sacerdote y le dije: 'Hablaste casi [toda] de mi vida. He tratado de cambiar mi vida, pero por alguna razón no he podido lograr ese cambio ". Entonces fue cuando me dijo: "Ve a San Pío. Allí podemos ayudarlo ". Entonces, por eso fui"*.

### Siguiendo el desarrollo del “Grupo de Hombres” The Men’s Group.

Rev. Charles W. Dahm, O.P. Ph.D. se convirtió en pastor de la parroquia de San Pío V en 1986. En abril de 1996, contrató a un trabajador social que descubrió que la VD era la preocupación más importante y más notoria de los feligreses que buscaban ayuda. En mayo de 1996, el p. Dahm contrató a otro trabajador social y comenzó a predicar sobre VD en St. Pius V. El trabajador social desarrolló y dirigió grupos de apoyo para sobrevivientes de mujeres como un

primer paso para abordar el problema más allá de crear conciencia a través de las homilías y el asesoramiento individual. Para 1998 y 1999, las mujeres del grupo de apoyo comenzaron a solicitar que la iglesia brindara ayuda a sus hijos que habían presenciado el abuso, así como servicios para ayudar a sus parejas masculinas a no ser violentas. Al mismo tiempo, los hombres mismos también comenzaron a pedir ayuda para cambiar su comportamiento. Como resultado, en 2001, “El Grupo de Hombres” (TMG) en la parroquia St. Pio V comenzó con un enfoque en satisfacer esta necesidad.

**Sostenibilidad financiera.** Desde el inicio del grupo, fue co-facilitado por un equipo hombre / mujer. Sin embargo, debido a restricciones presupuestarias, a veces el grupo ha operado con un facilitador en lugar de dos. A partir de marzo de 2017, TMG fue mantenido por un modesto puesto de salario de personal a tiempo completo con el objetivo continuo de establecer un segundo facilitador permanente. Se brinda cuidado infantil gratuito en el lugar a los participantes del grupo para que puedan asistir a las sesiones grupales. Aunque el presupuesto total del Programa HOPE creció a casi \$ 500,000 anualmente, el alcance de los servicios ofrecidos y los esfuerzos continuos para mejorar los servicios, significa que identificar el financiamiento siempre es una prioridad. Las principales fuentes de financiación han incluido históricamente premios financieros de la ciudad de Chicago, el estado de Illinois, fundaciones privadas, donaciones individuales y la parroquia. No hay tarifa para los participantes en “El grupo de Hombres” TMG, pero se aceptan donaciones. Al final de cada sesión grupal semanal, los miembros recolectan donaciones entre ellos para apoyar la continuación del programa. El anonimato de los participantes donantes y no donantes participantes se mantiene colocando donaciones en una silla. Después de que los facilitadores del grupo se van, un participante voluntario recolecta y entrega las donaciones a los facilitadores.

**Fuentes de referencia/ Referidos.** Las entrevistas, los grupos focales y los datos de observación indicaron que el programa HOPE no recluta activamente participantes para unirse a TMG. El personal y el clero informaron que los miembros actúan como la fuente principal de referencia, compartiendo los beneficios percibidos con otros que creen que pueden ser útiles para el grupo. Esto significa compartir sus experiencias con amigos, familiares, compañeros de trabajo o vecinos. Los participantes también pueden conocer “El Grupo de Hombres” (TMG) a través del clero, su familia, aquellos que buscan otros servicios del programa HOPE o trabajadores sociales comunitarios que conocen TMG.

**Procedimientos.** El personal informó que no existían procedimientos escritos sobre el proceso en el que los miembros se unían a TMG, sino que el personal operaba en un conjunto compartido de procesos conocidos. Los siguientes procedimientos se desarrollaron juntando datos recopilados durante entrevistas y refinados durante la verificación de miembros. El compromiso inicial generalmente comienza con un participante que llama al personal del programa. El personal registra información demográfica general, realiza una breve revisión telefónica, en la cual, el personal hace preguntas sobre la percepción y las conductas de la persona que llama en sus relaciones íntimas. Si el personal piensa que el cliente podría beneficiarse de TMG, lo invitan a asistir a una sesión grupal. Se requiere que los participantes sean mayores de 18 años (17 y menores son referidos para servicios de jóvenes / niños en el programa HOPE). “El Grupo de Hombres” (TMG) está esencialmente abierto a todos los hombres de habla hispana. El personal no recordaba haber rechazado a un hombre de TMG o no haber extendido una invitación. Después de asistir a una sesión grupal, generalmente se programa y completa una sesión individual con un cofacilitador grupal. Esta primera sesión individual se puede usar para aprender más sobre el cliente, realizar una evaluación más

detallada, discutir cómo el grupo sería beneficioso para el participante o servir como una sesión de asesoramiento general. Si se solicitan sesiones individuales adicionales, un co-facilitador grupal proporciona a las personas concurrentes sesiones grupales semanales. “El Grupo de Hombres” TMG se reúne una vez por semana durante aproximadamente dos horas. El grupo es exclusivamente voluntario. El personal o los voluntarios no proporcionan ninguna documentación de participación al sistema de corte en nombre de los miembros del grupo. Los clientes mandados por la corte no tienen prohibido asistir a los grupos o recibir asesoramiento individual, pero los requisitos de la corte deben cumplirse fuera de TMG mediante un programa aprobado por la corte.

**Asistencia y datos demográficos.** Los datos de asistencia de 2011 a 2015 (el más reciente disponible) indicaron que más de 400 hombres han asistido al menos a una sesión de “El Grupo de Hombres” (TMG). El análisis reveló que el tamaño promedio de grupo semanal en 2015 fue de 23 hombres y el tamaño de grupo más grande registrado fue de 43 hombres en 2012. Los datos de asistencia de estos cinco años indicaron que la "duración de la estadía" promedio para un hombre fue de ocho sesiones ( $n = 399$ ) con un mínimo de una sesión y un máximo de 74 sesiones.

Los 18 participantes del grupo focal en este estudio tenían edades comprendidas entre 33 y 48 años ( $M = 41$ ,  $SD = 6.08$ ), 100% católicos y 100% latinos, hispanos o mexicanos. Los participantes y el personal del grupo focal informaron que no todos los miembros de TMG son católicos o pertenecen a un grupo religioso. No todos los miembros del grupo viven en o cerca de Pilsen; algunos han viajado hasta 2-3 horas por semana (distancia de manejo de ida) para participar en el grupo.

Los participantes del grupo focal informaron que la duración de la membresía / asistencia a TMG en un rango de tres sesiones a 8 años. Cinco participantes completaron 3-8 sesiones, dos participantes completaron 15-16 sesiones, dos participantes asistieron al grupo durante 5-6 meses, tres participantes asistieron durante 1-2 años, dos participantes asistieron durante cuatro años y tres los participantes habían estado asistiendo 6, 7 y 8 años respectivamente. La asistencia y participación de los miembros del grupo no estaba vinculada a semanas consecutivas de participación, sino que a los participantes se les permitía participar continuamente por períodos de tiempo o tomar ausencia por períodos y reanudar la participación en cualquier momento. Por ejemplo, el número promedio de sesiones a las que asistió durante 2011-2015 fue de ocho, pero esto no significa que todas las sesiones se asistieron consecutivamente o incluso dentro del mismo año. Algunos participantes asisten semanalmente, algunos quincenalmente u otros asisten según lo consideren necesario. No existe un final definido del tratamiento dentro de TMG, lo que hace que el compromiso sea difícil de medir y evaluar.

**Ambiente Grupal, Contenido y Actividades.** Los datos de observación sirvieron como fuente principal para examinar la atmósfera y las actividades del grupo. Se tocó música instrumental suave en el vestíbulo del edificio antes de los horarios de reunión de grupo designados. Durante el comienzo del grupo, se tocaba música de fondo o instrumental similar a la naturaleza. Durante las sesiones grupales, la primera hora generalmente se dedicaba a una introducción o un saludo, en el que los participantes nuevos compartían la historia que los llevó a buscar ayuda de TMG. Los miembros establecidos también podrían usar la primera hora para compartir una situación en la que les gustaría recibir consejos o comentarios grupales. Los intercambios no fueron de confrontación. En particular, los participantes y los facilitadores de grupo rara vez interrumpían entre sí mientras hablaban, lo que permitía la plena expresión de

pensamientos, emociones y perspectivas. La segunda hora generalmente se dedica a proporcionar educación / información sobre diversos temas o debates grupales. La siguiente lista de temas se basó en datos de observación y datos obtenidos de la revisión de documentos:

- Comunicación Saludable entre parejas
- Formas de abuso; Financieras, Emocionales, Psicológicas
- Estrategias y habilidades para una vida pacífica (no violenta)
- Efectos de la violencia en los niños
- Aceptación cultural o religiosa de la violencia.
- Autoestima
- Crianza de los hijos
- Roles machistas / masculinos / sexuales tradicionales basados en la identidad de género
- Factores sociopolíticos que afectan el estrés del hogar / Manejo del estrés
- Efectos del trauma en los hombres.
- Poder y control
- Camaradería
- Negociación y equidad
- Soporte y confianza
- El respeto
- Comportamiento no amenazante
- Respeto sexual
- Responsabilidad y honestidad
- Celos
- Ira y control

Estos temas no son una lista prioritaria ni exhaustiva. Los datos de observación, entrevista y revisión de documentos indicaron que los temas se presentan a discreción de los cofacilitadores y se basan en la discusión de los participantes en la primera hora o sobre qué comentan las parejas en su grupo de apoyo (es decir, gritos, abuso sexual). Los miembros de TMG también pueden solicitar temas especiales e integrarlos en las sesiones. Por ejemplo, si los participantes deseaban hablar sobre "negociar decisiones importantes de la vida" (es decir, un movimiento importante), los facilitadores continuaron con una discusión líder y presentando materiales educativos que se han desarrollado a lo largo de los años. A menudo hubo breves períodos de silencio durante la sesión, en los que se les pidió a los participantes que hicieran una pausa y reflexionaran personalmente sobre los temas o materiales discutidos durante el grupo. Se alentó el diálogo, las preguntas y la reflexión durante toda la sesión grupal. No hay un "final de

tratamiento" exacto o un número recomendado de sesiones para "completar" el programa. TMG es abierto, lo que significa que los participantes pueden unirse o volver a unirse en cualquier momento, los temas se repiten y los participantes pueden permanecer el tiempo que deseen. Los facilitadores también complementan el material presentado en grupo al sugerir recursos adicionales como libros que pueden revisarse fuera de las sesiones grupales. Una lectura comúnmente sugerida es *The Knight in Rusty Armor*, una historia corta que narra el viaje de un hombre *"en busca de su verdadero yo"* (Fisher, 1987, p. 1).

**Enfoque Cultural.** El personal y los administradores señalaron que el programa HOPE se creó en respuesta a la demografía que inicialmente buscó y continuó buscando ayuda de la parroquia. El vecindario está compuesto principalmente por inmigrantes mexicanos, pero “El Grupo de Hombres” (TMG) fue diseñado para ser sensible a las necesidades únicas de los hombres latinos, independientemente de su ascendencia. El personal estimó que al menos el 90% de los participantes se identifican como mexicanos, sin embargo, también se observó que hay hombres en TMG con herencia puertorriqueña, caribeña, centro y sudamericana. TMG se facilita en español y los recursos educativos que lo acompañan (es decir, videos, libros) se presentan con mayor frecuencia en español. Algunos miembros del grupo eran monolingües (español) y otros eran bilingües (español / inglés). El espacio físico también reflejó la intención de servir a las familias latinas, ya que el edificio en el que se encuentra TMG estaba decorado con obras de arte mexicanas tradicionales.

Además, el contenido de TMG incluye un enfoque en examinar los aspectos positivos y negativos de las tradiciones culturales con las que se identifican muchos participantes (es decir, un fuerte sentido de responsabilidad hacia la familia y la visión de las mujeres como subordinadas a los hombres dentro del machismo). Por otro lado, un miembro del personal

señaló que *"no todos los latinos son iguales"* y se presta mucha atención para asegurarse de que cada participante sea entendido por derecho propio.

**Basado en la Espiritualidad.** Las sesiones comienzan con una breve oración que es dirigida voluntariamente por un miembro del grupo. La oración es seguida por un momento de silencio para meditar. El contenido de la oración cambia según el hombre que la ofrezca. Basado en datos de observación, la oración era generalmente de naturaleza general, dando gracias a Dios por el grupo y sus miembros como un recurso. Un facilitador señaló que *"no es religión porque tengo personas de diferentes religiones ...". Siempre tengo cuidado con eso "-Admin / Staff A.* Otro miembro del personal señaló *"Tratamos de no hacer nada directamente religioso o formal en el grupo para proteger que todos se sientan bienvenidos. A veces es difícil porque hay una dominante ... presencia cristiana [de] los que están físicamente en la sala. Y no queremos que domine si alguien no es desde una perspectiva cristiana [así que] bailamos delicadamente con eso ". - Administrador / Personal B.* Los datos de la entrevista indicaron que la religión y la fe espiritual están incorporadas en el grupo en la medida en que los participantes hablan sobre el tema. *"Si se menciona la fe durante la discusión grupal, [es] libre hablar, en términos de cómo impacta [a un miembro del grupo] o sus decisiones de relación ... En la comunidad latina, la fe es muy importante. Entonces, la gente viene y habla sobre la fe, y nunca los detengo. "- Administrador / Personal A.*

La revisión interna de los documentos indicó que la espiritualidad es incorporada al grupo mediante la exploración de los siguientes temas: 1) Control de pensamientos y acciones; 2) armonía interior / paz; 3) Concepto de Poder Superior (basado en la filosofía de 12 pasos) y 4) Reparación de daños (basado en la filosofía de 12 pasos). Los datos revelaron que el contenido relacionado con la religión se introdujo en TMG al reconocer los tiempos sagrados del año y a

través de medios complementarios que exploraron temas relevantes para TMG. Por ejemplo, un documento archivado (escrito por un miembro del personal) señaló: *“Durante el año, en algunos momentos específicos del calendario litúrgico, algunos temas relacionados con las prácticas religiosas de los participantes se mencionan o se relacionan con la vida grupal (es decir, Adviento, Navidad, Cuaresma, Pascua) ) ”*. Este documento señaló que las películas cristianas como Fireproof (2008), Courageous (2011) y Cicatrices (Scars) (2005) que exploran temas como conflictos matrimoniales, paternidad y VD se utilizan como recursos adicionales. Del mismo modo, películas cristianas como The Grace Card (2011) y The Good Lie (2014), que se centran en el crecimiento personal en un sentido más amplio, también se señalan como recursos.

**Socialización y voluntariado fuera de las sesiones formales.** Los facilitadores del grupo alientan a los miembros del grupo a apoyarse entre sí dentro y fuera de las sesiones grupales. Al final de cada grupo se hace un anuncio que invita a los miembros mayores a intercambiar información de contacto con los miembros nuevos del grupo. Un miembro del personal señaló: *“Es muy regular que haya líderes en el grupo que compartan su número de celular con otros y casi todos tengan al menos otro número de celular de otra persona en su grupo. Hay mucho contacto entre pares fuera del grupo. Entonces se comunican entre sí para pedir consejo o para ser otro oyente, con lo que están luchando o están a punto de actuar o lo que creen que quieren hacer o, por ejemplo, un comportamiento poco saludable ”-Admin / Personal B*

El contacto con los compañeros no se limita al apoyo en momentos de angustia. Por ejemplo, un administrador / personal relató un momento en que las discusiones grupales sobre los roles de género ayudaron a los participantes a darse cuenta de que varios de los hombres no sabían cocinar porque la cocina se consideraba como una actividad reservada para las mujeres.

Esta revelación llevó a los participantes del grupo a decidir independientemente reunirse para experimentar con recetas y aprender a cocinar. Otros se han apoyado mutuamente para buscar apoyos adicionales, como asistir juntos a Alcohólicos Anónimos. Otros miembros del grupo buscan tiempo adicional para discutir libros sobre IPV / A o asistir a la meditación juntos. La naturaleza de la actividad externa depende de los intereses de los miembros del grupo, por lo tanto, cambia con el tiempo.

Los facilitadores o sus pares invitan a los participantes de TMG a participar en una variedad de servicios o actividades de construcción de la comunidad. Por ejemplo, los participantes del grupo ayudaron a organizar eventos que celebran el día internacional de la mujer y organizaron eventos que sensibilizan a la comunidad sobre la VD. Como se observó a lo largo del estudio, estas actividades ocurrieron durante todo el año. Los datos de observación sugirieron que los miembros de TMG que participaron en estos eventos no estaban preocupados por el posible estigma, pero estaban orgullosos de ser vistos como miembros de TMG. Se seleccionaron tres eventos en los que los participantes de TMG desempeñaron roles clave para servir como ejemplos (ver Tabla 2)

Tabla 2. *Ejemplos de eventos en los que The Men's Group participa en sesiones grupales semanales*

|                                                                                            | Propósito                                                                                                   | Organizador                              | Audiencia                                                                                                                                                              | Responsabilidad del Grupo                                                                 |
|--------------------------------------------------------------------------------------------|-------------------------------------------------------------------------------------------------------------|------------------------------------------|------------------------------------------------------------------------------------------------------------------------------------------------------------------------|-------------------------------------------------------------------------------------------|
| Evento #1: La kermes anual (Jun. 3 <sup>rd</sup> , 4 <sup>th</sup> , 5 <sup>th</sup> 2016) | Un festival anual de la calle, organizado por la iglesia, música en vivo, bailes, juegos, carpas de comida. | Iglesia San Pio V                        | [700+]<br><br>Abierto al público en general: oficiales de policía, miembros de la comunidad, feligreses, facilitadores de grupos, clérigos, niños de todas las edades. | Limpieza de cocina, barrido al aire libre. Participa como asistentes.                     |
| Evento #2: evento educativo comunitario (10/14/16)                                         | Proporcionar conciencia sobre la violencia                                                                  | The Men's Group<br>"El Grupo de Hombres" | [40-50+]<br><br>Abierto al público en general: proveedores locales de servicios de                                                                                     | .<br><br>Presentación a los asistentes sobre los elementos necesarios para una asociación |

|                                                                      |                                                                               |                                  |                                                                                                                                                                                                                    |                                                                                                         |
|----------------------------------------------------------------------|-------------------------------------------------------------------------------|----------------------------------|--------------------------------------------------------------------------------------------------------------------------------------------------------------------------------------------------------------------|---------------------------------------------------------------------------------------------------------|
|                                                                      | doméstica, compromiso con la vida pacífica                                    |                                  | salud, clérigos, niños de todas las edades                                                                                                                                                                         | saludable. Participación como asistentes                                                                |
| Evento #3: Recaudación de fondos del programa Baile / HOPE (2/10/17) | Cena formal para banquetes, música en vivo, banda tradicional mexicana, baile | Programa HOPE Personal & Parejas | [300+] No está abierto al público en general (limitado solo por invitación): destinatarios del servicio del programa HOPE, destinatarios de la familia de servicios, donantes, clérigos, niños de todas las edades | Venta de boletos a familiares y amigos para recaudar dinero para el programa. Participa como asistentes |

**Modalidad de tratamiento y objetivos.** El personal y el clero informaron que los objetivos principales de TMG son que los participantes tomen conciencia de sí mismos, detengan la violencia / abuso, comprendan que la violencia no es una forma de resolver problemas de relación y aprendan formas saludables de lidiar con problemas que puedan surgir dentro de relaciones íntimas . Un facilitador informó que se basó en el Modelo de Duluth (Pence y Paymar, 1993) como un plan de estudios orientador, pero el enfoque observado por el IP reflejó un enfoque que integraba las técnicas cognitivo-conductuales (TCC), la atención basada en el trauma y las entrevistas motivacionales. Se observaron más diferencias con el modelo de Duluth en TMG que similitudes. Por ejemplo, TMG no exigió a los participantes que documentaran comportamientos abusivos en un registro de control, se concentraran ampliamente en la rueda de poder y control, ni firmaran una divulgación de información. TMG no siguió un modelo de tratamiento de 28 semanas como Duluth o ciclo de temas de 3 semanas para los temas (Pender, 2012). TMG exploró una amplia gama de temas, agregando la intersección de la cultura, la espiritualidad y las estrategias de meditación para mejorar el plan de estudios y reflejar las necesidades de los participantes. Dadas las estrategias innovadoras para complementar el contenido curricular, particularmente las oportunidades de los programas para involucrarse con el personal y los compañeros más allá de las reuniones semanales, se descubrió que TMG era más que un derivado de Duluth adaptado para hombres latinos, y en cambio reflejaba una modalidad de tratamiento única que se basaba en una variedad de modelos de tratamiento

**RQ 2a: ¿Qué motivó a los participantes actualmente involucrados a asistir inicialmente a TMG?**

Independientemente de la fuente de referencia original, los hombres identificaron una variedad de motivaciones para unirse inicialmente al grupo. El personal / la administración / el clero y los participantes de TMG informaron lo siguiente como las razones más comunes para unirse al grupo:

- Miedo a perder o la pérdida real de su pareja o familia debido a sus acciones abusivas / Presión de una pareja para obtener ayuda: *"Tengo diez años de casado con mi esposa pero en estos diez años cometí violencia doméstica ... hubo abuso de mi parte ... yo también era alcohólico. Y luego llegó un momento en que mi esposa me detuvo y me dijo que todo iba a terminar y luego comencé a buscar ayuda y fue entonces cuando un conocido me dijo que en Saint Pius, ofrecieron un programa que tal vez podría ayudarme ... así es como empecé en el grupo ". - Miembro del grupo*
- Reconociendo un problema y deseando cambiar para los niños, para mí y para los demás: *"Fui solo y fue por los problemas que tuve. Entiendo que por nosotros mismos, no podemos hacer el cambio. No podemos hacerlo solos. Es por eso que fui al grupo y estoy aprendiendo de ellos ". - Miembro del grupo*
- Un deseo de alcanzar la paz interior: *"Fui al grupo, el grupo de hombres, porque ya no podía encontrar la paz. No pude encontrar la paz. Estaba desesperado. Hubo peleas en mi casa, peleas con mis hijos. La mayor parte del tiempo, estaba enojado. Ni siquiera sabía lo que quería, dónde estaba o qué estaba haciendo. Trabajé más duro [pero] no había nada que pudiera llenarme por dentro, así que eso fue lo que me hizo buscar todo esto ". - Miembro del grupo*

**RQ 2b: ¿Por qué los participantes involucrados actualmente siguen participando en TMG?**

Tres temas principales surgieron y ayudan a la comprensión de por qué los hombres permanecen comprometidos después de unirse inicialmente a “El Grupo de Hombres” (TMG). Estos temas se centraron en el respeto, el apoyo y el aprendizaje y sirvieron de base para el desarrollo de la teoría relacionada con la retención.

**Dignidad y Respeto.** Uno de los temas principales planteados por los hombres relacionados con la participación continua en “El Grupo de Hombres” (TMG) fue la interacción positiva con los facilitadores de grupo. Estas interacciones fueron percibidas como positivas, estimulantes y de apoyo:

*"Lo que más me gusta es cómo me responde mi consejero ... no de la manera que quiero escuchar, porque si quisiera que él respondiera con lo que quiero escuchar, bueno, entonces (risas) estoy perdiendo el tiempo allí". . Él me responde como un profesional total. Después de escucharme, tiene todo el tiempo y la paciencia. A veces me he extendido con él dos o tres horas. Tiene mucha paciencia. "- Miembro del grupo*

Un miembro del personal señaló que era importante permitir a los miembros nuevos el espacio suficiente para desahogar las frustraciones de sus relaciones para que volvieran a otras sesiones grupales y no se desanimaran por una lluvia de interrupciones y desafíos. Este enfoque se confirmó a través de observaciones que revelaron interacciones no combativas pero respetuosas con los miembros nuevos del grupo. Los participantes informaron que el respeto que sentían del personal reconocía su dignidad y valor humanos. Como lo describió un miembro del grupo: “(Usted) no es solo un número: (Usted) es tratado como la persona que es ... Se siente

*amado. Te sientes bienvenido. La calidez del grupo es lo que te hace superar ciertos problemas en la vida"*

La administración y el clero destacaron que para cumplir con los miembros del grupo con respeto, se requería la intencionalidad. Por ejemplo, los facilitadores incitaron a los participantes a asumir roles de liderazgo durante las sesiones (es decir, transferir el control de la redacción de una diapositiva de power point sobre el contenido de la discusión a un miembro del grupo en lugar de un co-facilitador). Reconocer y resaltar las fortalezas / habilidades de los miembros del grupo pareció generar confianza y reforzar el valor que cada miembro del grupo aportó a TMG (ya sea nuevo o establecido).

Foto 2: Personal del Programa HOPE en la "Gala de Beneficio para la Violencia Doméstica 2017 celebrando el 80 cumpleaños del p. Charles Dahm "

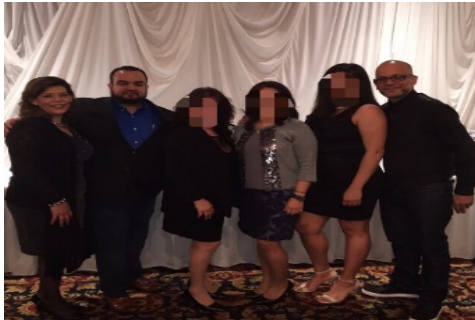

Permiso para la replica de esta imagen fue obtenido

**Estableciendo a los miembros del grupo como "familia".** Los participantes percibieron que las relaciones que experimentaron con otros miembros eran similares a una hermandad, lo que facilitó la participación recurrente con "El Grupo de Hombres" (TMG). Un miembro del grupo lo explicó diciendo: *"Cuando entras allí, no encuentras amigos, encuentras una familia con la que sabes que puedes contar en tus peores momentos"*. Esta hermandad parecía depender de la accesibilidad de ese grupo los miembros se tenían el uno al otro de manera continua. Un miembro del grupo relató lo siguiente:

*“Cuando alguien tiene la necesidad de hablar o está en crisis o necesita ayuda o una sugerencia, siempre hay libertad de ... Te llamo. ‘¿Tienes algo de tiempo para hablar? Podemos ir a tomar un café. Podríamos hacerlo por teléfono. “Casi siempre, hay disponibilidad de uno de nosotros ... Si no es uno, es otro, y nos vemos fuera del grupo ... Existe ese apoyo fuera del grupo. Es por eso que mis colegas mencionan que nos encontramos casi como una hermandad. Encontramos otra familia.”*

Este apoyo social también fue observado y alentado por los administradores y el personal. Como destacó un miembro del personal, *"El grupo no es solo todos los miércoles ... es las 24 horas del día y los siete días de la semana" - Personal / Administrador C.* Además, este apoyo se extendió más allá de los límites de la discusión de temas interpersonales o de relación. Un miembro del grupo destacó ese ejemplo al compartir: *“Como hoy, llegué tarde porque estaba ayudando a uno de los colegas a mudarse. Se sometió a una cirugía, y no pudo, por lo que su esposa fue la que hizo la mayor parte del movimiento, así que fui a ayudarlos, porque ... surgió (en grupo), y me preguntó si podía ayudarlo ... ”*

**Beneficios obtenidos en el Programa.** Otro tema importante relacionado con la participación prolongada se centró en el conocimiento que los participantes informaron que obtuvieron de “El Grupo de Hombres” (TMG).

*“Sigo yendo a las clases grupales porque la verdad es que cambia la perspectiva de cada uno de los que estamos aquí presentes, y creo que no me dejan mentir. No vamos a cambiar de noche a día, pero creo que esto es algo que hacemos paso a paso ... la verdad es que cambia nuestras vidas ”-Miembro del grupo*

*“Yo fui por mi propia necesidad. Nadie me obligó ni nada, está bien. Me he sentido muy cómodo allí porque hay mucha información. Videos, recomendaciones de libros, hay mucha información. Por eso me ha funcionado. ”-Miembro del grupo*

Los participantes percibieron que el conocimiento obtenido de TMG estaba fuertemente conectado con el crecimiento positivo en su procesamiento cognitivo de sus problemas y el comportamiento resultante.

*“Ha habido un cambio radical en mi vida. Veo la vida de una manera diferente, trato de estar con mi familia lo mejor que puedo. Hay más comunicación ... más enfoque en los niños y espero que este mensaje llegue a los oídos de más hombres con nuestros problemas. ”- Miembro del grupo*

*"Si no hubiera ido a ese lugar, estaría con problemas ... con problemas civiles, con el gobierno, con la policía ... Lo que he aprendido en este lugar es que debes tratar de hablar y razonar cosas con palabras y no con golpes "- Miembro del grupo*

Aprendiendo y experimentando el crecimiento gracias al grupo sirvió como una razón por la cual los miembros del grupo con señoría continúan participando, incluso cuando sus propias necesidades o problemas han disminuido. En este caso, la tutoría con la intención de transmitir conocimiento y apoyo también fue una motivación para regresar continuamente al grupo.

Para muchos participantes, las razones para continuar participando no se limitaron a un solo tema, sino debido al efecto combinado de dos o tres temas. Como dijo un miembro del grupo:

*“Llegué a un punto en el que había renunciado y sabía que necesitaba ayuda, así que miré, ¿verdad? En ese momento, mi ex suegra me habló sobre el grupo y que podía cambiar ... así que le dije: 'Veamos en qué me puede ayudar el grupo' ... Ahora, después de dos años, he visto que*

*es una comunidad de hombres donde uno ayuda al otro y uno puede abrirse ... sin juzgar, pero nos dan herramientas para ayudarnos a mejorar nuestras vidas y es por eso que me he quedado en este grupo porque sé que en este grupo, he encontrado Más que ayuda. He encontrado amigos He encontrado familia". - Miembro del grupo*

### **Tesis Generada**

El modelo teórico inicial fue construido a partir de este estudio y sugiere que tanto el respeto experimentado por el personal del programa como el apoyo social experimentado por los compañeros del grupo influyen en el compromiso prolongado entre los hombres. Los beneficios percibidos de los participantes tienen una relación recíproca con su compromiso continuo en “El Grupo de Hombres” (TMG). El modelo teórico propuesto, como ilustrado en la Figura 1, se ajusta bien con los datos de este estudio, que es un fuerte marcador de su validez potencial (Eisenhardt, 1989). Sentirse respetado por el personal del programa era un requisito previo para que los participantes entrantes construyeran relaciones duraderas con otros miembros del grupo. El respeto experimentado también fue un factor necesario para que los miembros entrantes se sintieran lo suficientemente cómodos como para regresar a las sesiones grupales. El experimentar el apoyo social en forma de amistad o parentesco facilitó la conexión con otros miembros del grupo. Se informó que estas relaciones eran esenciales para que los hombres hicieran cambios hacia una vida pacífica.

El modelo teórico está incrustado en los factores ambientales de nivel mezzo / meso que rodean la función de TMG. La relación entre la parroquia y la comunidad más grande de Pilsen fue fuerte, lo que indica un grado de confianza mutua. El liderazgo de la parroquia también demostró un compromiso para crear conciencia sobre el tema de IPV / A y abogó por el fin de la violencia y el abuso dentro de las familias.

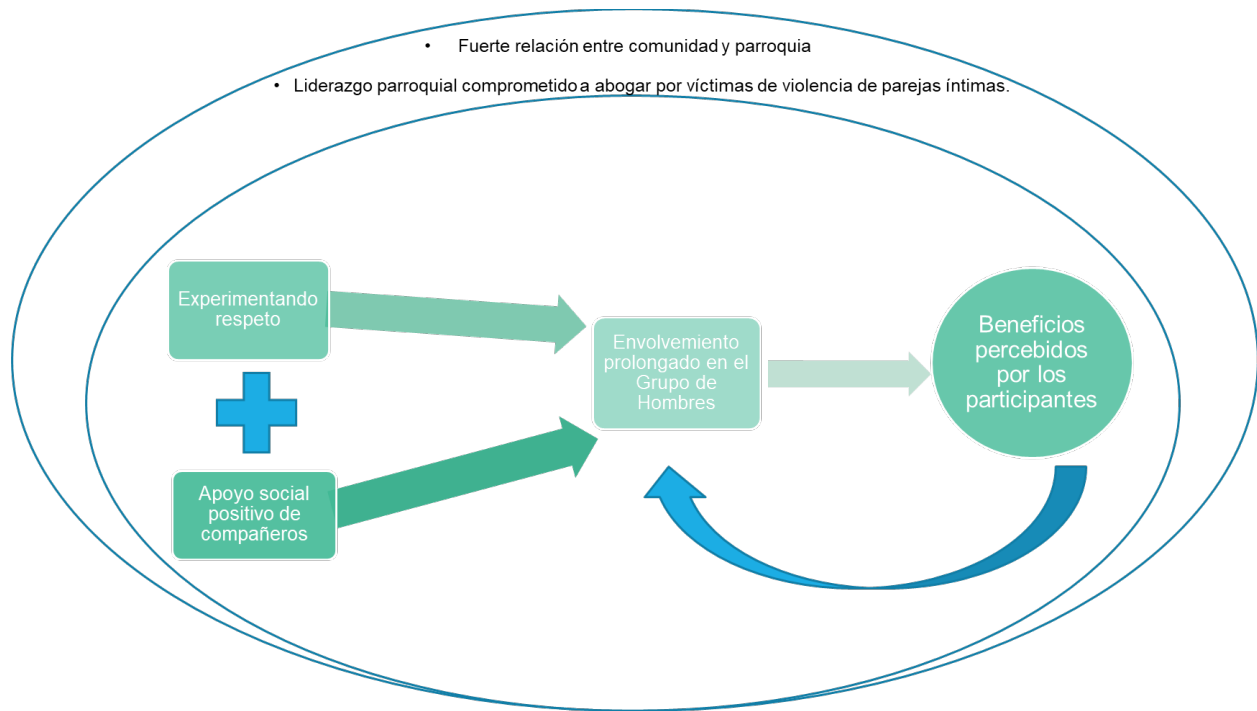

Figura 1. Modelo teórico emergente sobre la participación prolongada de hombres (no obligados por la corte) en un programa parroquial de intervención sobre el abuso entre parejas

## Discusión

Este estudio examinó el funcionamiento de “El Grupo de Hombres” (TMG) en St. Pio V y los factores asociados con la participación de los participantes en un PAIP voluntario. La comprensión de la naturaleza y el contexto de un programa tan único puede ofrecer una idea de cómo alcanzar a las poblaciones que perpetran formas de abuso no criminalizadas pero dañinas, a través de intervenciones que se apoyan, desarrollan y dirigen dentro de su comunidad. El primer elemento crucial de dicha programación es un apoyo fuerte de la comunidad. En el caso de “El Grupo de Hombres” (TMG), este apoyo a nivel comunitario se refleja en la relación de la parroquia con la comunidad y en el compromiso del liderazgo de la parroquia con la defensa de IPV / A. Este apoyo comunitario puede ser similar a una respuesta comunitaria coordinada, que se ha identificado como esencial en una respuesta del sistema de justicia penal a DV (Shepard y

Pence, 1999). El modelo teórico utilizado para explicar la participación actual de los hombres en “El Grupo de Hombres” (TMG) revela factores de nivel micro y mezzo / meso que se corresponden con el marco socio ecológico en IPV / A (Heise, 1998) que integra la teoría de sistemas, las perspectivas feministas y otros puntos de vista teóricos sobre IPV / A. Estos hallazgos subrayan los hallazgos de investigaciones anteriores, lo que indica que los factores de nivel comunitario, grupal e individual contribuyen de manera colectiva e independiente a los comportamientos de los participantes de PAIP dentro de las relaciones íntimas (Sheehan, Thakor y Stewart, 2012).

Nuestros hallazgos brindan a los profesionales e investigadores un ejemplo práctico de cómo un PAIP puede adaptar o diseñar un servicio a una población en particular e introducir estrategias innovadoras para fomentar las relaciones terapéuticas entre los facilitadores y los miembros del grupo. TMG funciona mediante la integración de la psi coeducación grupal, la terapia cognitiva conductual, el asesoramiento individual, las técnicas de entrevistas motivacionales, la atención informada sobre el trauma y las técnicas de la filosofía de los 12 pasos a través de un lente centrado en la cultura y la espiritualidad. Esta integración refleja el concepto reciente que los BIP se alejen del modelo tradicional de talla única y toma en cuenta las necesidades individuales, como la etapas de cambio (Maiuro y Eberle, 2008; Musser, Semiatin, Taft y Murphy, 2008 ; Kistenmacher y Weiss, 2008). Estos hallazgos son importantes porque ofrecen una comprensión más profunda de las actividades del programa y al mismo tiempo proveen mas evidencia sobre por qué los participantes actualmente involucrados siguen comprometidos con “El Grupo de Hombres” (TMG). Los profesionales académicos han abogado por la creación de entornos que permitan a los hombres compartir abiertamente sus experiencias

mientras aprenden de otros en un esfuerzo por reducir la perpetración de IPV / A (Mancera, Dorgo y Provencio-Vasquez, 2017).

Los hallazgos en este estudio brindan apoyo evidenciable a consideraciones teóricas publicadas previamente para mejorar la retención y el compromiso. El estudio identificó el apoyo positivo entre los miembros y el respeto del personal hacia los participantes como elementos clave para la participación de los hombres (sin mandatos judiciales) en el programa. Los hallazgos sobre el apoyo entre miembros del grupo son consistentes con las sugerencias de literatura existentes para la mejora del programa PAIP, como que los participantes construyan relaciones dentro y fuera del BIP como un factor reportado que facilita el cambio de comportamiento (Sheehan, Thakor y Stewart, 2012). Un elemento único de TMG es el grado en que los miembros del grupo socializan y se apoyan mutuamente fuera de las sesiones formales del grupo. A pesar de la investigación que sugiere que el desarrollo de relaciones dentro y fuera de los PAIP puede ser un predecesor necesario para cambiar los comportamientos de los hombres violentos en pareja (Sheehan, Thakor y Stewart, 2012), la práctica tradicional ha desalentado la socialización externa por temor a la posible colusión de miembros que podrían conducir a problemas como culpar a la víctima indiscutible. Los facilitadores tienden a tener cierto grado de autonomía en los PAIP, lo que ha resultado en informes de algunos programas que establecen sistemas de amigos entre los miembros del grupo o alientan a los ex participantes a ser mentores (patrocinadores) de los miembros del grupo (Muldoon y Gary, 2011). Si bien las preocupaciones sobre la posibilidad de colusión entre patrocinador y aprendiz para alentar la violencia pueden merecer atención (Almeida y Bograd, 1991), el estudio presente brinda cierto apoyo empírico para los beneficios potenciales de las relaciones positivas entre los miembros y contrasta el uso tradicional de la teoría del apoyo social entre pares masculinos, que se centra en

el refuerzo de los comportamientos negativos (DeKeseredy y Schwartz, 2013). Han pasado casi 10 años desde que Barbara Hart (2009) sugirió examinar el poder del apoyo positivo entre miembros masculinos dentro de los PAIP como un mecanismo para reducir el IPV / A, sin embargo, no tenemos conocimiento de investigaciones que exploren esta mejora potencial del programa. Para avanzar en este campo, se deben documentar a fondo los diferentes enfoques y evaluar los resultados entre las poblaciones para ver si enfoques tan controvertidos como el apoyo de pares pueden ser un componente clave de los programas exitosos.

El respeto fue un tema constante y reportado tanto por los participantes como por el personal con respecto al compromiso y la retención. Aunque la Asociación Nacional de Trabajadores Sociales resalta la importancia de conocer a los clientes con respeto, independientemente del problema en el que busquen ayuda, los comportamientos de práctica reales pueden diferir (DiFranks, 2008).

Es posible que se necesite capacitación especializada para garantizar la implementación de los principios básicos del trabajo social cuando se trabaja con poblaciones que pueden ser percibidas como problemáticas. La construcción de una buena relación es una habilidad necesaria en cualquier entorno de práctica directa, pero sin que los clientes experimenten un sentido fundamental de respeto, los esfuerzos de tratamiento pueden reducirse sustancialmente si no se eliminan por completo (Corvo y Johnson, 2003). Las descripciones de los participantes sobre el respeto percibido pueden haber sido una expresión de los facilitadores que establecieron y desarrollaron lazos terapéuticos con los participantes, lo que, según los estudiosos, es clave para el tratamiento exitoso de la perpetración de IPV (Taft, Murphy y Creech, 2016).

### **Fortalezas, limitaciones y Propuestas el Futuro**

Los puntos fuertes del estudio incluyen la contribución a la literatura sobre intervenciones para el abuso entre parejas a través de un estudio de un PAIP voluntario basado en la comunidad.

Dado que tales programas son generalmente obligatorios, se necesitan estudios para desarrollar, implementar y evaluar programas voluntarios de intervención PAIP con diversos grupos en los Estados Unidos. Una limitación principal del estudio fue que el IP no hablaba español con fluidez. Para ayudar a combatir este desafío, se contrataron dos AI bilingües para ayudar con la traducción, la recopilación de datos y el análisis durante todo el estudio. Además, el análisis de los datos de los grupos focales se realizó en inglés, después de la traducción del español. La información podría haberse perdido durante la traducción, por lo tanto, tener varios miembros del equipo de investigación bilingüe presentes en grupos focales y disponibles para revisar las traducciones ayudó a reducir los errores relacionados con las limitaciones del idioma. Debido a la naturaleza cualitativa de este estudio, existía el riesgo de que el IP imponga su propia comprensión conceptual sobre los datos. Compartir y discutir los resultados con las partes interesadas a medida que se desarrollaban ayudó a asegurar la comprensión, mejorar la precisión y mitigar esta preocupación.

Aunque el período de recopilación de datos abarcó nueve meses, el grupo mismo ha estado en funcionamiento durante más de 15 años. Si el estudio se hubiera llevado a cabo en un momento diferente de la vida del programa, los resultados podrían haber variado. Por ejemplo, las observaciones grupales para este estudio comenzaron poco después de que el programa reubicara el sitio de la reunión. Aunque los participantes indicaron que no hubo diferencias basadas en este cambio, sin observar al grupo en el entorno anterior, el análisis de datos de observación comparativos no fue posible. Además, muchos de los procesos establecidos probablemente fueron resultados de las lecciones aprendidas en puntos específicos del desarrollo del programa que no pudieron identificarse retrospectivamente. Del mismo modo, no está claro si la participación y los resultados se mantendrán constantes. Hay un énfasis importante del

pastor asociado en los esfuerzos regionales de IPV / A. El nuevo pastor principal de San Pío V aún no ha demostrado un fuerte compromiso para apoyar la programación de violencia doméstica afiliada a la parroquia. Dados los orígenes únicos y el enfoque de “El Grupo de Hombres” (TMG), no está claro cómo los cambios en el liderazgo afectarán la sostenibilidad. Dada la escasa literatura existente sobre los PAIP voluntarios y la el hecho que es literatura específica es aun mas pequeña sobre la población atendida, estas descripciones detalladas pueden proporcionar información valiosa a otras personas que buscan evaluar o replicar el enfoque.

Los participantes del grupo focal no pueden considerarse una representación aleatoria de los miembros del grupo de hombres. Aquellos que se ofrecieron como voluntarios para participar en los grupos focales pueden tener opiniones o experiencias diferentes que aquellos que no eligieron participar en este estudio o aquellos que actualmente no participan en “El Grupo de hombres” (TMG). Por otro lado, los estudios de casos por naturaleza están diseñados y realizados para una descripción detallada en lugar de generalización (Yin, 2003). La información del estudio se trianguló bien con los datos que el programa mantuvo sobre la asistencia a lo largo de los años, lo que sugiere niveles notables de compromiso para un PAIP voluntario. Sin embargo, la dosis de tratamiento que informaron los participantes con señoría es ambigua. No está claro qué tan bien se correlacionan los "años de compromiso" con el número de sesiones asistidas y los temas cubiertos. Además, dado el alcance extendido del compromiso grupal y los informes de aprendizaje entre miembros fuera de las sesiones formales, se necesita más investigación para comprender si la dosificación de las sesiones tiene un impacto separado de las interacciones con la red de apoyo informal.

A pesar de las limitaciones, este estudio es una contribución significativa al campo de PAIP. “El Grupo de Hombres” (TMG) en St. Pio V es uno de los pocos modelos conocidos que

se dirigen a participantes voluntarios de una manera culturalmente informada y / o espiritualmente sensible. Debido a que la investigación se ha centrado en los modelos tradicionales provistos para clientes obligatorios, no está claro cuántos modelos similares a TMG existen o qué tan efectivos son. Si bien el estudio actual avanzó en la comprensión del funcionamiento interno del programa y las percepciones de TMG de los participantes, no fue posible evaluar la efectividad. Es importante examinar los resultados de comportamiento con algún tipo de comparación o control. Además, dado que el modelo propuesto se construyó dentro de una comunidad e institución específicas a solicitud de los sobrevivientes y los hombres que buscaron ayuda sin un mandato judicial, no se sabe si se pueden obtener resultados similares de participación y retención para diferentes comunidades, instituciones y grupos culturales. o clientes obligatorios.

Como resultado del estudio actual y la falta general de literatura de investigación sobre PAIP voluntarios (especialmente dentro de los EE. UU.), Se plantearon varias preguntas para estudios en el futuro. Por ejemplo, a pesar de que los sistemas de amigos se han incorporado como una herramienta para la socialización dentro de algunos PAIP (Faulkner, Stoltenberg, Cogen, Nolder y Shooter, 1992), hasta la fecha no se han realizado pruebas sobre el impacto de la socialización entre miembros para mejorar los resultados con el abuso entre parejas. En el futuro se debe examinar si existe alguna asociación entre los resultados positivos del tratamiento y la socialización entre los miembros fuera del grupo o las percepciones de la conectividad entre ellos.

Además, la investigación sobre las percepciones de los participantes de PAIP sobre el respeto del personal / facilitador hacia ellos es limitada. Estudios en el futuro deberían de examinar cómo los miembros del grupo PAIP experimentan respeto en el contexto del

tratamiento grupal para que pueda ser probado como un factor contribuyente en los resultados de los participantes. Tampoco está claro cómo y cuándo la programación espiritual o basada en la fe puede mejorar la participación o los resultados del programa. Del mismo modo, es importante para las investigaciones en el futuro que examinen cómo las diferencias en el lenguaje del programa de los servicios sociales comprometidos con la fe (es decir, basados en la fe frente a la espiritualidad) pueden influir en la prestación del servicio o la percepción de los servicios por parte del cliente. Dada la ocurrencia generalizada de IPV / A y las numerosas críticas a los enfoques actuales de los PAIP, es imperativo que la investigación en esta área se extienda más allá de los enfoques tradicionales para comprender cómo mejorar la participación y los resultados. Además, se desconoce cuán similares o diferentes son los hombres que sirven en este programa en comparación con una población típica de hombres con mandato judicial. Puede haber o no diferencias en la disposición al cambio, tácticas previas de abuso perpetrado, gravedad de la violencia, abuso de sustancias, antecedentes de salud mental u otras áreas. Un estudio reciente en Canadá comparó las características de los participantes de PAIP obligatorios por la corte con los hombres sin mandato judicial en un PAIP y encontró relativamente pocas diferencias demográficas y resultados similares entre los grupos después del tratamiento (Tutty, Babins-Wagner y Rothery, 2019). Se está trabajando en el futuro para investigar más a fondo las diferencias / similitudes entre aquellos en TMG y los participantes ordenados por la corte de un PAIP tradicional. La investigación futura también examinará los resultados de la intervención longitudinalmente en los dos grupos. Se espera que este artículo fomente la investigación sobre enfoques de programas innovadores y voluntarios para intervenir con hombres que han actuado de manera abusiva contra su (s) pareja (s) íntima (s) para que la sociedad pueda reducir efectivamente la incidencia y el impacto de este importante problema social.

## Resumen

La violencia entre parejas es un problema importante tanto social como de la salud pública. Es importante tener en cuenta el nombre del PAIP examinado (El Grupo de Hombres) cuando se considera el título de la atención informada en el área de trauma para los hombres que han participado en violencia o abuso dentro de relaciones íntimas (de interés romántico o sexual). Los PAIP estructurados en grupo deben ser conscientes del impacto potencial que el apoyo social positivo entre los miembros fuera del grupo y el respeto percibido y demostrado por los facilitadores del grupo que pueden tener en la participación de los hombres en los PAIP. Se especula que estos aspectos cuando se combinan con el trabajo grupal podrían resultar útiles en los esfuerzos para involucrar y retener a los hombres en el tratamiento. Nuestros hallazgos también indicaron que los factores de nivel mezzo / meso, como el liderazgo de la parroquia que abogó abiertamente contra IPV / A y una fuerte relación entre la comunidad y la parroquia en general, fueron clave para construir un entorno comunitario que promueva y mantenga la participación en un PAIP voluntario basado en la espiritualidad y la fe.

## Acknowledgments

“Los autores agradecen sinceramente a los participantes del estudio, el programa HOPE/Grupo de hombres en la parroquia de San Pío V, los asistentes de investigación, y las muchas entidades representadas en la comunidad colaborativa tablero. Para obtener una versión en español de esta publicación, por favor siga este enlace. La versión en español no fue revisada por pares por el American Journal of Men’s Health”

## Referencia Bibliográfica

Almeida, R. V., & Bograd, M. (1991). Sponsorship: Men holding men accountable for domestic violence. *Journal of Feminist Family Therapy*, 2(3-4), 243-259.

Altheide, D., Coyle, M., DeVriese, K., & Schneider, C. (2008). Emergent qualitative document analysis. In *Handbook of emergent methods* (pp. 127-152).

Babcock, J., Armenti, N., Cannon, C., Lauve-Moon, K., Buttell, F., Ferreira, R., . . . Lehmann, P. (2016). Domestic violence perpetrator programs: A proposal for evidence-based standards in the United States. *Partner abuse*, 7(4), 355-460.

Badillo, D. A. (2005). Collision course: The strange convergence of affirmative action and immigration policy in America/Parish ministry in a Hispanic community. *Journal of the Illinois State Historical Society*, 98(3).

Barrera Jr., M., Castro, F. G., Strycker, L. A., & Toobert, D. J. (2013). Cultural adaptations of behavioral health interventions: A progress report. *Journal of consulting and clinical psychology*, 81(2), 196-205.

Bernard, H. R. (2013). *Social Research Methods: Qualitative and Quantitative Approaches*. Thousand Oaks, CA: Sage.

Black, M. C., Basile, K. C., & Breiding, M. J. (2011). The National Intimate Partner and Sexual Violence Survey (NISVS): 2010 summary report. US department of Health and Human Services, CDC, Atlanta, GA. Retrieved from [http://www.cdc.gov/violenceprevention/nisvd/2010\\_report.html](http://www.cdc.gov/violenceprevention/nisvd/2010_report.html)

Bowen, G. A. (2009). Document analysis as a qualitative research method. *Qualitative research journal*, 9(2), 27-40.

Breiding, M. J., Basile, K. C., Smith, S. G., Black, M. C., & Mahendra, R. (2015). Intimate Partner Violence Surveillance: Uniform Definitions and Recommended Data Elements. National Center for Injury Prevention and Control. Atlanta, Georgia: Centers for Disease Control and Prevention.

Caetano, R., Cunradi, C. B., Clark, C. L., & Schafer, J. (2000). Intimate Partner Violence and drinking patterns among White, Black and Hispanic couples in the U.S. *Journal of Substance Abuse*, 11, 123-138.

Cannon, C. (2016). A survey of domestic violence perpetrator programs in the United States and Canada: findings and implications for policy and intervention. *Partner abuse*, 7(3), 226-276.

Celaya-Alston, R. C. (2010). *Hombres en Accion (Men in Action): A Community Defined Domestic Violence Intervention with Mexican, Immigrant Men*. Dissertations and Theses.

Corvo, K., & Johnson, P. J. (2003). Vilification of the “batterer”: How blame shapes domestic violence policy and interventions. *Aggression and Violent Behavior*, 8(3), 259-281.

Crane, C. A., Hawes, S. W., Mandel, D., & Easton, C. (2013). Informed consent: An ethical issue in conducting research with male partner violent offenders. *Ethics & Behavior*, 23(6), 477-488.

Crane, C., & Eckhardt, C. (2013). Evaluation of a single-session brief motivational enhancement intervention for partner abusive men. *Journal of Counseling Psychology*, 60(2), 180-187.

Creswell, J. (2003). *Research design: Qualitative, quantitative, and mixed methods approaches* (2nd ed.). Thousand Oaks, CA: SAGE Publications.

Creswell, J. W., & Clark, V. L. (2016). *Designing and Conducting Mixed Methods Research* (3rd ed.). Thousand Oaks, CA: Sage.

Creswell, J. W., & Poth, C. N. (2017). *Qualitative inquiry and research design: Choosing among five approaches* (4th ed.). Thousand Oaks, CA: Sage.

Cummings, A. M., Gonzalez-Guarda, R. M., & Sandoval, M. F. (2013). Intimate Partner Violence Among Hispanics: A Review of the Literature. *Journal of Family Violence*, 28(2), 153–171.

Cunradi, C. B., Caetano, R., Clark, C., & Schaffer, J. (2000). Neighborhood poverty as a predictor of intimate partner violence among White, Black, and Hispanic couples in the United States: A multilevel analysis. *Annals of Epidemiology*, 10(5), 297-308.

Dahm, C. W., & Harper, N. (1999). St. Pius V Roman Catholic Church and the Pilsen area Resurrection Project. In N. Harper, *Urban churches, vital signs: Beyond charity toward justice* (pp. 168-181). Grand Rapids, MI: Eerdmans.

Dalton, B. (2007). What's Going on out there?: A Survey of Batterer Intervention Programs. *Journal of Aggression, Maltreatment, & Trauma*, 15(1), 59-74.  
doi:10.1300/J146v15n01\_04

Daly, J. E., & Pelowski, S. (2000). Predictors of dropout among men who batter: A review of studies with implications for research and practice. *Violence and Victims*, 15, 137-160.

Davis, M. (2015). Theorizing Religious Abuse in the Context of Intimate Partner Violence: The African-American Community. *Journal of Black Sexuality & Relationships*, 1(4).

DeKeseredy, W. S., & Schwartz, M. D. (2013). *Male peer support and violence against women: the history and verification of a theory*. Northeastern University Press.

DiFranks, N. N. (2008). Social workers and the NASW Code of Ethics: Belief, behavior, disjuncture. *Social Work*, 53(2), 167-176.

Ebaugh, H. R., Chafetz, J. S., & Pipes, P. F. (2006). Where's the faith in faith-based organizations? Measures and correlates of religiosity in faith-based service coalitions. *Social Forces*, 84(4), 2259-2272.

Eisenhardt, K. M. (1989). Building theories from case study research. *Academy of management review*, 14(4), 532-550.

Evans, D. G. (Director). (2011). *The Grace Card* [Motion Picture]. Samuel Goldwyn Films.

Executive Office of the President. (2010, November 17). Executive Order 13559 Fundamental Principles and Policymaking Criteria for Partnerships With Faith-Based and Other Neighborhood Organizations. Retrieved August 20, 2017, from Office of the Federal Register: <https://www.federalregister.gov/documents/2010/11/22/2010-29579/fundamental-principles-and-policy-making-criteria-for-partnerships-with-faith-based-and-other>

Falardeau, P. (Director). (2014). *The Good Lie* [Motion Picture]. Warner Bros. Entertainment.

Faulkner, K., Stoltenberg, C. D., Cogen, R., Nolder, M., & Shooter, E. (1992). Cognitive-behavioral group treatment for male spouse abusers. *Journal of Family Violence*, 7(1), 37-55.

Fisher, R. (1987). *The Knight in Rusty Armor*. CA: Marcia Grad.

Flores, A. (2017). *How the U.S. Hispanic population is changing*. Washington, DC: Pew Research Center.

Glaser, B. G., & Strauss, A. L. (1967). *The discovery of grounded theory: Strategies for qualitative research*. Chicago: Aldine.

Grossman, S. F., Cardoso, R. M., Belanger, G. G., Belski, J., Corethers, T. C., Pettinelli, M. E., & Redd, M. A. (2000). Pilsen and The resurrection project. *Journal of Poverty*, 4(1-2), 131-149.

Hart, B. (2009). Future directions for BIPs: Examining the power of male peer support and building alternative support communities. Policy symposium batterer intervention: Doing the work and measuring the progress. Bethesda, MD: Sponsored by the National Institute of Justice and Family Violence Prevention Fund.

Heise, L. L. (1998). Violence against women: An integrated, ecological framework. *Violence Against Women*, 4(3), 262-290.

Herman, K., Rotunda, R., Williamson, G., & Vodanovich, S. (2014). Outcomes from a Duluth model batterer intervention program at completion and long term follow-up. *Journal of Offender Rehabilitation*, 53(1), 1-18.

Hill, C. E., Knox, S., Thompson, B. J., Nutt-Williams, K., Hess, S. A., & Ladany, N. (2005). Consensual qualitative research: An update. *Journal of Counseling Psychology*, 52(2), 196-205.

Hoelt, J. (2009). *Agency, Culture, and Human Personhood*. Eugene, OR: Wipf and Stock.

Israel, B. A., Schulz, A. J., Parker, E. A., & Becker, A. B. (1998). Review of community-based research: assessing partnership approaches to improve public health. *Annual review of public health*, 19(1), 173-202.

Jeavons, T. H. (1997). Identifying characteristics of "religious" organizations: An exploratory proposal. In N. J. Demerath III, P. D. Hall, T. Schmitt, & R. H. Williams, *Sacred*

Companies: Organizational Aspects of Religion and Religious Aspects of Organizations (pp. 79-95). New York: Oxford University Press.

Kendrick, A. (Director). (2008). *Fireproof* [Motion Picture].

Kendrick, A. (Director). (2011). *Courageous* [Motion Picture]. Provident Films.

Kistenmacher, B. R., & Weiss, R. L. (2008). Motivational interviewing as a mechanism for change in men who batter: A randomized controlled trial. *Violence & Victims*, 23(5), 558-570.

Klevens, J. (2007). An overview of intimate partner violence among Latinos. *Violence Against Women*, 13(2), 111-122.

Kroeger, C., & Nason-Clark, N. (2010). *No Place for Abuse: Biblical and Practical Resources to Counteract Domestic Violence* (2nd ed.). Downers Grove, IL: InterVarsity Press.

Lira, L. R., Koss, M. P., & Russo, N. F. (1999). Mexican American women's definitions of rape and sexual assault. *Hispanic Journal of Behavioral Science*, 21(3), 236-265.

Maiuro, R. D., & Eberle, J. A. (2008). State standards for domestic perpetrator treatment: Current status, trends, and recommendations. *Violence and Victims*, 23(2), 133-155.

Mancera, B. M., Dorgo, S., & Provencio-Vasquez, E. (2017). Risk factors for Hispanic male intimate partner violence perpetration. *American Journal of Men's Health*, 11(4), 969-983.

Merriam, S. B. (1998). *Qualitative research and case study applications in education*. San Francisco: Jossey-Bass Publishers.

Miles, M. B., Huberman, A. M., & Saldana, J. (2013). *Qualitative data analysis*. Thousand Oaks, CA: Sage.

Misra, T. (2014, Oct 9). Why Chicago is still the No. 2 U.S. city for Mexican immigrants. Retrieved from <http://www.citylab.com/housing/2014/10/why-chicago-is-still-the-2-us-city-for-mexican-immigrants/381304/>

Muldoon, J., & Gary, J. (2011). Enhancing treatment compliance among male batterers: motivators to get them in the door and keep them in the room. *Journal of Mental Health Counseling*, 33(2), 144-160.

Murphy, C. M., & Maiuro, R. D. (2009). *Motivational Interviewing and Stages of Change in Intimate Partner Violence*. New York: Springer Publishing Company.

Musser, P. H., Semiatin, J. N., Taft, C. T., & Murphy, C. M. (2008). Motivational interviewing as a pre-group intervention for partner-violent men. *Violence & Victims*, 23(5), 539-557.

Nason-Clark, N., & Fisher-Townsend, B. (2015). *Men Who Batter*. New York, NY: Oxford University Press.

Nason-Clark, N., Murphy, N., Fisher-Townsend, B., & Ruff, L. (2004). An overview of the characteristics of the clients at a faith-based batterers' intervention program. *Journal of Religion & Abuse*, 5(4), 51-72.

Pallares, A., & Flores-González, N. (2010). ¡ Marcha!: Latino Chicago and the immigrant rights movement. University of Illinois Press.

Parra-Cardona, J. R., Escobar-Chew, A. R., Holtrop, K., Carpenter, G., Guzmán, R., Hernández, D., . . . González Ramírez, D. (2013). "En el grupo tomas conciencia (In group you become aware)" Latino immigrants' satisfaction with a culturally informed intervention for men who batter. *Violence against women*, 19(1), 107-132.

Passel, J., & Cohen, D. (2008). *US Population Projections*. Washington, DC: Pew Hispanic Center, Pew Research Center.

Patton, M. Q. (2002). *Qualitative evaluation and research methods*. Thousand Oaks, CA: Sage.

Pence, E., & Paymar, M. (1993). *Education Groups for Men Who Batter: The Duluth Model*. New York: Springer.

Pender, R. L. (2012). ASGW best practice guidelines: An evaluation of the Duluth model. *The Journal for Specialists in Group Work*, 37(3), 218-231.

Rothman, E. F., Butchart, A., & Cerda, M. (2003). *Intervening with perpetrators of intimate partner violence: A global perspective*. Geneva: World Health Organization.

Sheehan, K. A., Thakor, S., & Stewart, D. E. (2012). Turning points for perpetrators of intimate partner violence. *Trauma, Violence, & Abuse*, 13(1), 30-40.

Shepard, M. F., & Pence, E. L. (1999). *Coordinating community responses to domestic violence: Lessons from Duluth and beyond*. Thousand Oaks, CA: SAGE.

Sider, R. J., & Unruh, H. R. (2004). Typology of religious characteristics of a social service and educational organizations and programs. *Nonprofit and Voluntary Sector Quarterly*, 33(1), 109-134.

Stake, R. E. (1995). *The art of case study research*. Thousand Oaks, CA: Sage.

Stark, E. (2007). *Coercive Control: The Entrapment of Women in Personal Life*. New York: Oxford University Press.

Starkey, A. D. (2015). The Roman Catholic Church and Violence Against Women. *Religion and Men's Violence Against Women*, 177-193.

Starr, K. (2017). Scars of the Soul: Get Refusal and Spiritual Abuse in Orthodox Jewish Communities. *Nashim: A Journal of Jewish Women's Studies & Gender Issues*, 31, 37-60.

Stewart, D. W., & Shamdasani, P. N. (2015). *Focus Groups: Theory and Practice* (Third ed.). Los Angeles: Sage.

Straus, M. A., & Smith, C. (1990). Violence in Hispanic Families in the United States. In M. A. Straus, & R. J. Gelles, *Physical violence in American families: Risk factors and adaptations to violence in 8,145 families* (pp. 341-367). New Brunswick, NJ: Transaction Publishers.

Taft, C. T., Murphy, C. M., & Creech, S. K. (2016). Trauma-informed treatment and prevention of intimate partner violence. American Psychological Association.

Toro, P. D. (Director). (2005). *Cicatrices* [Motion Picture].

Tutty, L. M., Babins-Wagner, R., & Rothery, M. A. (2019). The Responsible Choices for Men IPV Offender Program: Outcomes and a Comparison of Court-Mandated to Non-Court-Mandated Men. *Journal of Aggression, Maltreatment & Trauma*, 1-22.

Welland, C., & Ribner, N. (2001). A demographic and risk-factor survey of Mexican immigrants mandated to partner abuse treatment in San Diego county. *Family Violence and Sexual Assault Bulletin*, 17(1-2), 13-19.

Welland, C., & Ribner, N. (2010). Culturally specific treatment for partner-abusive Latino men: A qualitative study to identify and implement program components. *Violence and Victims*, 25(6), 799-813.

Welland, C., & Wexler, D. (2007). *Sin golpes: Cómo transformar la respuesta violenta de los hombres en la pareja y la familia*. Mexico City: Editorial Pax.

Yin, R. K. (2003). *Case study research: Design and methods* (3rd ed.). Thousand Oaks, CA: Sage.

## Apéndice A

### Preguntas del Grupo Focal/ Guion (Ingles)

#### I. Introduction

Note—as participants are entering the room, the facilitator will:

- Ask the participant to make a name tag with any first name the participant wants to use for today's group. Thank you all for coming to participate in this focus group. My name is \_\_\_\_\_. I will be facilitating this session. Next to me is \_\_\_\_\_. S/he will be helping me take notes for this session.

#### II. Ground Rules

Before we start, I wanted to review some basic group rules. We will be talking about some topics that may feel very personal. And so:

- Please remember that you do not need to answer any questions that make you feel uncomfortable. If you become upset during the discussion, it is OK to step out of the room. Please try to stay nearby so that \_\_\_\_\_ or I can go check to make sure you are OK.
- Please try to respect others confidentiality. Please address people by the name they use today and have on their name tags. Although every precaution will be taken to safeguard your confidentiality, it cannot be guaranteed in a group setting.
- Please respect that others may have different opinions and experiences than you. We are interested in hearing about ALL of your opinions. Feel free to express your disagreement with what others may say, but please try to do so in a respectful manner without putting down or discounting anyone.
- You'll notice we have tape recorders here. We are audio taping the discussions. This helps us to catch all that you say. You might find that at some point I need to ask one person to speak at a time, so that we can catch everything.
- Are there any ground rules that you would like to add or is there anything else we can do as a group to make you feel safe and comfortable during the focus group?

Before we begin, does anyone have any questions about the focus group process?

#### III. Focus group questions:

Let's go around the room. Please tell us either your first name or a pseudo name for today, and an estimate of how many St. Pius "Men's Group" sessions you have attended, or how long you have been going to The Men's Group.

[Signal non-verbally where you'd like the responses to start]

- 1) Why did you start going to the group?
- 2) What were the reasons you went to a church for this type of help?
- 3) You were not court mandated to attend the Men's group, so what influenced you to keep returning?
- 4) What would need to occur to motivate more men to attend other groups like "The Men's" Group?"
- 5) Is culture and faith incorporated into the Men's Group? If so, how?
- 6) What are the things you like best about the program?
- 7) What would you change about the program?

OK, we're going to switch gears and little

- 1) What factors do you think can lead to a man to be abusive toward his partner?
- 2) Has faith or religion influenced you to stop abusive treatment of your partner?—If so how?
- 3) Were there times that you used faith or religion to control your partner?—If so how?
- 4) What are other important things about domestic violence would you like to talk about?

We are getting close to the end of our discussion. I'm going to ask \_\_\_\_\_ to give us a summary of the key issues you've talked about. Then we need to know from you---

- Did we hear you right?
- Did we leave anything out that you think we should put in?

#### IV. Wrap up:

Thank you again very much for participating in this group (this evening). If you have any questions for me or the researcher, feel free to contact us, using the information provided on your consent form. Additionally, we recognize that we have discussed some very sensitive topics today. If there is something that you need to discuss further please see your group facilitator. We also have a list of resources that may be helpful if desired. If there was anything else you wanted to share, but more privately, you may write it on a notecard and place it in this box.

Thank you.

Adaptado de (Celaya-Alston, 2010)

## Apéndice A

### Preguntas del grupo Focal/ Guion (Español)

#### I. Introducción

Nota: cuando los participantes ingresen a la sala, el facilitador:

- Pídale al participante que haga una etiqueta con cualquier nombre que el participante quiera usar para el grupo de hoy.

Gracias a todos por venir a participar en este grupo de enfoque. Me llamo \_\_\_\_\_. Estaré facilitando esta sesión. A mi lado está \_\_\_\_\_. Él / ella me ayudará a tomar notas para esta sesión.

#### II Reglas de juego

Antes de comenzar, quería revisar algunas reglas básicas del grupo. Hablaremos sobre algunos temas que pueden parecer muy personales. Y entonces:

- Recuerde que no necesita responder ninguna pregunta que lo haga sentir incómodo. Si se molesta durante la discusión, está bien salir de la sala. Por favor, trate de permanecer cerca para que \_\_\_\_ o yo pueda ir a verificar para estar seguro.
- Intente respetar la confidencialidad de los demás. Diríjase a las personas por el nombre que usan hoy y que tengan en sus etiquetas de nombre. Aunque se tomarán todas las precauciones para salvaguardar su confidencialidad, no se puede garantizar en un entorno grupal.
- Respete que los demás puedan tener opiniones y experiencias diferentes a las suyas. Estamos interesados en conocer TODAS sus opiniones. Siéntase libre de expresar su desacuerdo con lo que otros pueden decir, pero intente hacerlo de manera respetuosa sin menospreciar o descartar a nadie.
- Notará que tenemos grabadoras aquí. Estamos grabando audio las discusiones. Esto nos ayuda a captar todo lo que dices. Es posible que en algún momento necesite pedirle a una persona que hable a la vez, para que podamos captar todo.
- ¿Hay alguna regla básica que le gustaría agregar o hay algo más que podamos hacer como grupo para que se sienta seguro y cómodo durante el grupo focal?

Antes de comenzar, ¿alguien tiene alguna pregunta sobre el proceso del grupo focal?

#### III. Preguntas del grupo focal:

Pasemos por la habitación. Por favor díganos su nombre o seudónimo para hoy, y una estimación de cuántas sesiones del "Grupo de Hombres" de St. Pius ha asistido, o cuánto tiempo ha estado en The Men's Group.

[Señale no verbalmente dónde desea que comiencen las respuestas]

- 1) ¿Por qué empezaste a ir al grupo?
- 2) ¿Cuáles fueron las razones por las que fuiste a una iglesia por este tipo de ayuda?
- 3) No tenía el mandato judicial de asistir al grupo de hombres, entonces, ¿qué lo influenció a seguir regresando?
- 4) ¿Qué debería ocurrir para motivar a más hombres a asistir a otros grupos como "El grupo de los hombres"?
- 5) ¿La cultura y la fe están incorporadas en el Grupo de Hombres? ¿Si es así, cómo?

6) ¿Cuáles son las cosas que más te gustan del programa?

7) ¿Qué cambiarías del programa?

OK, vamos a cambiar de marcha

1) ¿Qué factores crees que pueden llevar a un hombre a ser abusivo con su pareja?

2) ¿Le ha influido la fe o la religión para detener el trato abusivo de su pareja? Si es así, ¿cómo?

3) ¿Hubo ocasiones en que usó la fe o la religión para controlar a su pareja? Si es así, ¿cómo?

4) ¿De qué otras cosas importantes sobre violencia doméstica le gustaría hablar?

Nos estamos acercando al final de nuestra discusión. Voy a preguntar \_\_\_\_\_ para darnos un resumen de los temas clave de los que ha hablado. Entonces necesitamos saber de usted ---

- ¿Te escuchamos bien?

- ¿Dejamos fuera algo que crees que deberíamos poner?

IV. Envolver:

Muchas gracias de nuevo por participar en este grupo (esta noche). Si tiene alguna pregunta para mí o para el investigador, no dude en contactarnos, utilizando la información provista en su formulario de consentimiento. Además, reconocemos que hemos discutido algunos temas muy sensibles hoy. Si hay algo que necesita discutir más, consulte a su facilitador de grupo. También tenemos una lista de recursos que pueden ser útiles si lo desea. Si deseaba compartir algo más, pero de forma más privada, puede escribirlo en una tarjeta de notas y colocarlo en este cuadro.

Gracias.

Adaptado de (Celaya-Alston, 2010)

## Apéndice B

### Reporte sobre el estudio

2017 REPORTE BREVE

### El Grupo de Hombres en St. Pío V: Un Estudio de un Programa de Intervención Voluntaria para el Abuso entre Parejas.

Hecho #1: La violencia doméstica puede ser física, emocional, sexual, económica, psicológica y más...

Hecho #2: **Solamente 1%** de los hombres que cometen violencia doméstica contra su pareja estará arrestado o convicto y buscará ayuda a través de consejería (Stark, 2007). Por eso, casi todos los hombres que actúan abusivamente nunca consiguen la ayuda que necesitan para cambiarse.

El Grupo de Hombres de San Pío V llega a hombres que quieren cambiarse.

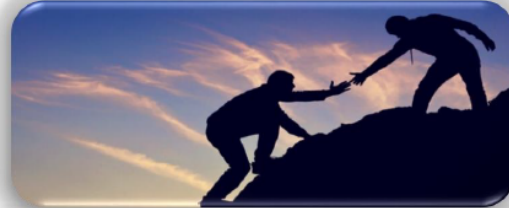

### Resultados del Estudio

Más de **400** hombres han buscado *voluntariamente* ayuda para su perpetración de violencia doméstica a través de "El Grupo de Hombres" en San Pío V sin ser obligados por la corte. Este programa les ofrece esperanza de cambio.

#### Pregunta #1: ¿Cómo funciona El Grupo de Hombres?

- El Grupo de Hombres es co-facilitado por un hombre y una mujer
- Actualmente se ofrece solamente en español
- Se reúne semanalmente y discute temas como:
  - Comunicación de relación saludable
  - Formas económicas, emocionales, psicológicas de abuso
  - Habilidades necesarias para una vida pacífica
- Ofrece asesoramiento individualizado como necesario
- Los compañeros se apoyan durante la semana
- Se basa en la espiritualidad y cultura
- No se proporciona documentación del tratamiento a la corte

#### Pregunta #2: ¿Por qué los hombres buscan ayuda en El Grupo de Hombres?

- Pérdida o miedo de pérdida de su pareja o familia debido a su abuso.
- Deseo de cambiar para los niños, personalmente o para los demás
- Deseo de conseguir la paz interior.

#### Pregunta #3: ¿Por qué los hombres continúan participando voluntariamente en El Grupo de Hombres?

##### El equipo los trata con RESPETO Y DIGNIDAD

"[Usted] no es solamente un número— [Usted] está tratado como la persona que usted es. Se siente apreciado, aceptado y bienvenido. El calor del grupo es lo que ayuda a superar ciertos problemas en la vida"— Participante con Señoría

##### Los miembros del grupo se convierten en FAMILIA

Camaradería: "Al entrar al grupo, uno no encuentra amigos—uno encuentra una familia con la que puede contar durante los momentos más difíciles"— Participante con Señoría

Accesibilidad: "El grupo no está solamente cada miércoles. Son 24 horas al día, siete días a la semana"— Empleado/Administrador

##### Todos ganan BENEFICIOS Y APRENDEN

"Yo sigo yendo al grupo porque la verdad es que ha cambiado nuestras vidas"— Participante Nuevo

"Si yo no hubiera ido a ese lugar, tendría (peores) problemas. Lo que he aprendido en ese lugar es que uno tiene que hablar y razonar las cosas con palabras y no con golpes"— Participante con Señoría

El Grupo de Hombres es una entidad de HOPE Family Services de la Parroquia de San Pío V en Chicago. Para más información, llame al 312-421-7647 o visite <http://stpiousparish.org/hope-at-st-pius-v/>. El reporte completo será publicado pronto. Investigador Principal: Maxine Davis MSW, MBA, PhD Candidate. Para más preguntas acerca de este estudio, Por favor contactar al email: [maxinedavis@wustl.edu](mailto:maxinedavis@wustl.edu). Este estudio presentado en este reporte fue fundado con el apoyo de the Catholics For Family Peace Education and Research Initiative a Catholic University of America v Dominican University. Conducido con la colaboración de:

2017 BRIEF REPORT

## The Men's Group at St. Pius V Parish: A Case Study of a Voluntary Partner Abuse Intervention Program

Fact #1: Domestic violence can be physical, emotional, sexual, financial, psychological and more....

Fact #2: **Only 1%** of men who commit domestic violence against an intimate partner will be arrested, convicted, and get help through court mandated counseling (Stark, 2007). Therefore, most men who act abusively never get the help they need to change.

St. Pius V Men's Group reaches men who want to change.

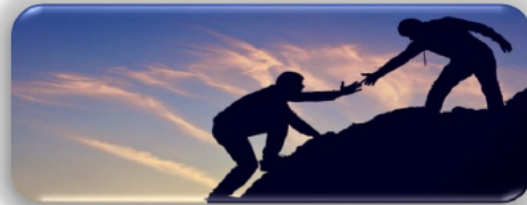

### Study Results

Over **400** men have voluntarily sought help for domestic violence perpetration through "The Men's Group" at St. Pius V without being court-mandated to participate. This program gives HOPE for change.

#### Question #1: How does "The Men's Group" work?

- Group of men co-facilitated by man and woman team
- Currently offered in Spanish language only
- Meets weekly and discusses topics like:
  - Healthy Relationship Communication
  - Financial, Emotional, Psychological forms of abuse
  - Skills for peaceful living
- One-on-one counseling as needed
- Strong peer support throughout the week
- Spirituality-based and culturally sensitive
- Does NOT supply documentation of treatment to the court

#### Question #2: Why do men seek help from The Men's Group?

- Loss or fear of losing partner and/or family due to abusive actions
- Desire to change for children, self, and others
- Desire to reach inner peace

#### Question #3: Why do men continue voluntary participation in The Men's Group?

##### Staff treats them with RESPECT & DIGNITY

*"[You] are not just a number-- [You] are treated like the person you are... You feel loved. You feel welcome. The warmth of group is what makes you overcome certain problems in life" – Senior Participant*

##### Group members become FAMILY

*Brotherhood: "When you enter there, you don't find friends--you find a family with one that you know that you can count on in your worst times." – Senior Participant*

*Accessibility: "The group is not only every Wednesday...it's 24 hours a day, and seven days a week" – Staff/Admin*

##### Men gain BENEFITS & LEARN

*"I keep going to the group classes because the truth is....it changes our lives" – New Participant*

*"If I hadn't gone to that place, I would have [worse] problems...what I have learned in this place is that you [must] try to talk and to reason things with words and not with blows" – Senior Participant*

The Men's Group is an entity of The HOPE Family Services at St. Pius V parish in Chicago. For more information call 312-421-7647 or visit <http://stpiusvparish.org/hope-at-st-pius-v/>. The full report will be published soon. Principal Investigator: Maxine Davis MSW, MBA, PhD Candidate. For questions about the research study email: [maxinedavis@wustl.edu](mailto:maxinedavis@wustl.edu).

The research presented in this report was funded by the Catholics For Family Peace Education and Research Initiative at Catholic University of America and Dominican University.

Conducted in partnership with:

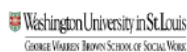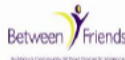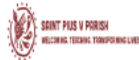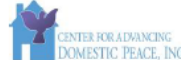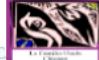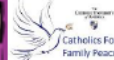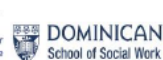

DOMINICAN UNIVERSITY  
School of Social Work
